1 **Bacteriophage  $\lambda$  RexA and RexB Functions Assist the Transition from Lysogeny to Lytic**  
2 **Growth**

3

4 running title:  $\lambda$  Rex proteins assist phage lytic development

5

6

7

8

9 Lynn C. Thomason<sup>1,2</sup>, Carl J. Schiltz<sup>3,4</sup>, Carolyn Court<sup>2</sup>, Christopher J. Hosford<sup>3,5</sup>, Myfanwy C.

10 Adams<sup>3</sup>, Joshua S. Chappie<sup>3</sup>, and Donald L. Court<sup>2</sup>

11

12 <sup>1</sup>Basic Science Program, Frederick National Laboratory for Cancer Research, Frederick, MD

13 21702

14 <sup>2</sup>RNA Biology Laboratory, National Cancer Institute/Frederick Cancer Research and

15 Development Center, Frederick, MD 21702

16 <sup>3</sup>Department of Molecular Medicine, Cornell University, Ithaca, NY 14850

17 <sup>4</sup>Present address: Department of Biological Sciences and Center for Structural Biology,

18 Vanderbilt University, Nashville, TN 37232, USA

19 <sup>5</sup>Present address: New England Biolabs, Inc., Ipswich, MA, USA

20

21 Corresponding author: Lynn Thomason [thomasol@mail.nih.gov](mailto:thomasol@mail.nih.gov) (301) 846-7206

22

23

## 24 **Summary**

25 The CI and Cro repressors of bacteriophage  $\lambda$  create a bistable switch between lysogenic and  
26 lytic growth. In  $\lambda$  lysogens, CI repressor expressed from the  $P_{RM}$  promoter blocks expression of  
27 the lytic promoters  $P_L$  and  $P_R$  to allow stable maintenance of the lysogenic state. When lysogens  
28 are induced, CI repressor is inactivated and Cro repressor is expressed from the lytic  $P_R$   
29 promoter. Cro repressor blocks  $P_{RM}$  transcription and CI repressor synthesis to ensure that the  
30 lytic state proceeds. RexA and RexB proteins, like CI, are expressed from the  $P_{RM}$  promoter in  $\lambda$   
31 lysogens; RexB is also expressed from a second promoter,  $P_{LIT}$ , embedded in *rexA*. Here we  
32 show that RexA binds CI repressor and assists the transition from lysogenic to lytic growth,  
33 using both intact lysogens and defective prophages with reporter genes under control of the lytic  
34  $P_L$  and  $P_R$  promoters. Once lytic growth begins, if the bistable switch does return to the immune  
35 state, RexA expression lessens the probability that it will remain there, thus stabilizing the lytic  
36 state and activation of the lytic  $P_L$  and  $P_R$  promoters. RexB modulates the effect of RexA and  
37 may also help establish phage DNA replication as lytic growth ensues.

38

39

40

41

42 **Keywords:** bacteriophage  $\lambda$ , lysogeny, prophage, lytic growth, phage development, genetic  
43 switch

44

## 45 **Introduction**

46  $\lambda$  is a temperate bacteriophage and thus can exist in either the lysogenic or lytic state (H Echols,  
47 1986; Oppenheim, Kobiler, Stavans, Court, & Adhya, 2005). The transition between these two  
48 states is mediated by two  $\lambda$  regulators: CI and Cro (Eisen et al., 1975; Ptashne & Hopkins, 1968).  
49 In the lysogenic state, the phage chromosome is integrated into that of its host *Escherichia coli*  
50 and is quiescent with its lytic functions repressed by the CI protein (Ptashne & Hopkins, 1968).  
51 In the repressed lysogen, pairs of CI dimers bind cooperatively to operator sites  $O_{L1}$  and  $O_{L2}$  on  
52 the left and  $O_{R1}$  and  $O_{R2}$  on the right to repress the early  $P_L$  and  $P_R$  promoters (Figure 1),  
53 respectively, and thereby, inhibit transcription of all the lytic genes downstream from those  
54 promoters (A. D. Johnson, Meyer, & Ptashne, 1979). Interaction between CI repressor molecules  
55 bound to the left and right operators results in topological looping of the intervening DNA,  
56 which contains the phage immunity region (Dodd, Shearwin, & Egan, 2005); this looping  
57 enhances repression of  $P_L$  and  $P_R$  and stabilizes the lysogenic state. In a lysogen, the *cI* repressor  
58 gene is transcribed and expressed from the  $P_{RM}$  promoter (Spiegelman et al., 1972). When CI  
59 repressor is bound to  $O_{R1}$   $O_{R2}$ , it activates transcription initiation by RNA polymerase at the  $P_{RM}$   
60 promoter (Lewis, Gussin, & Adhya, 2016). Two other genes, *rexA* and *rexB*, are downstream of  
61 the *cI* gene and, like *cI*, are expressed as part of the  $P_{RM}$  operon (Benzer, 1955; Matz, Schmandt,  
62 & Gussin, 1982) (Figure 1). A second promoter,  $P_{LIT}$ , is located within the distal end of *rexA*,  
63 and transcribes just *rexB* (Hayes, Bull, & Tulloch, 1997; Landsmann, Kroger, & Hobom, 1982).  
64 Thus, *rexB* can be transcribed by either  $P_{RM}$  and/or  $P_{LIT}$  (Hayes & Szybalski, 1973; Liu, Jiang,  
65 Gu, & Roberts, 2013; Thomason et al., 2019). A  $\lambda$  lysogen can switch to the lytic pathway,  
66 produce progeny phage, and lyse its host, releasing phage. This can happen in response to DNA  
67 damage, which in *E. coli* initiates the SOS response (d'Ari, 1985; Witkin, 1991). Single-stranded

68 DNA is generated as a result of the damage and is bound by the RecA protein, converting RecA  
69 to an activated DNA-bound form, RecA\*. RecA\* binds the CI repressor and acts as a co-  
70 protease, initiating auto-cleavage of the CI protein (Craig & Roberts, 1980; Ennis, Ossanna, &  
71 Mount, 1989). Loss of CI repression leads to activation of the lytic  $P_L$  and  $P_R$  promoters. The *cro*  
72 gene, which encodes the Cro repressor, is the first transcribed gene from the  $P_R$  promoter (H.  
73 Echols, Green, Oppenheim, Oppenheim, & Honigman, 1973; Folkmanis, Maltzman, Mellon,  
74 Skalka, & Echols, 1977). Cro repressor binds to the same operator sites as CI, but with a  
75 different pattern of affinities (Darling, Holt, & Ackers, 2000; A. Johnson, Meyer, & Ptashne,  
76 1978). As Cro repressor is made, it first binds  $O_{R3}$  and represses the  $p_{RM}$  promoter, thus  
77 blocking  $P_{RM}$  and *cI* gene transcription, and further reducing CI repressor levels and stabilizing  
78 the switch to lytic expression. Thus, Cro locks in the anti-CI repressor state, also called the  
79 nonimmune state, ensuring lytic growth (Ptashne et al., 1980; Svenningsen, Costantino, Court, &  
80 Adhya, 2005) .

81  
82  $\lambda$   $cI^+$  lysogens, which express wild type CI repressor, are maintained in a repressed state at any  
83 growth temperature. A mutation in the *cI* gene, *cI857*, results in a temperature sensitive repressor  
84 protein; at lower temperatures at 37°C and below,  $\lambda$  prophages with the *cI857* allele form stable  
85 lysogens, and switch to lytic growth at temperatures above 37°C (Sussman & Jacob, 1962). This  
86 occurs without any requirement for DNA damage or an SOS response. The *cI ind1* allele (Jacob  
87 & Campbell, 1959) results in an E117K amino acid change in the CI repressor protein (Gimble  
88 & Sauer, 1985) that prevents SOS mediated RecA\* coprotease autocleavage of the CI repressor,  
89 making the prophage uninducible by DNA damage.

90

91 Baek et al. (2003) noticed that a  $\lambda$  lysogen with the *rexA* and *rexB* genes replaced with *gfp* was  
92 less inducible at low ultraviolet (UV) doses than a lysogen with *rexA* and *rexB* intact, suggesting  
93 that one or both of the Rex proteins have a role in prophage induction. We have further explored  
94 the effects of RexA and/or RexB on repression and the induction of  $\lambda$  from the repressed  
95 prophage state. Our findings suggest that RexA stabilizes the nonimmune state. RexB appears to  
96 antagonize the effect of RexA and may be involved in establishment of the phage DNA  
97 replication complex once the transition to lytic growth occurs. Results showing that the Rex  
98 system may assist in the establishment of phage replication are found in Supporting Information  
99 Results and Discussion and Table S1.

100

## 101 **Results**

102 **RexA and RexB proteins modulate the level of phage yield in response to UV induction.** We  
103 compared the ultraviolet inducibility of  $\lambda cI^+$  lysogens, defective in RexA and/or RexB functions,  
104 to each other and to wild type Rex<sup>+</sup> lysogens (Figure 2A). The lysogen defective for RexA  
105 function, LT1676, retains the  $P_{LIT}$  promoter and expresses RexB fully from both  $P_{RM}$  and  $P_{LIT}$   
106 (see bacterial strains in Table 1). Relative to a wild type  $\lambda rexA^+ rexB^+$  lysogen (filled circles),  
107 the three lysogens defective for Rex function induce less well at low UV doses, but all induce  
108 like wild type at the highest doses (Figure 2A).  $\lambda cI^+$  lysogens defective for RexA function are  
109 very defective for induction at low levels of irradiation irrespective of whether the phage  
110 expresses RexB function. In fact, the RexA mutant (open triangles) is as impaired for induction  
111 at low UV doses as a lysogen lacking both RexA and RexB functions (open circles). In contrast,  
112 the lysogen defective for only RexB function (filled triangles) is similar to wild type in  
113 responding to low levels of UV and shows only a modest reduction in levels of phage produced,

114 i.e., pfu/ml in Figure 2A. In summary, these results demonstrate a positive activity of RexA in  
115 promoting induction of the lysogen when switching to the lytic state in response to low levels of  
116 DNA damage. There is a small positive effect of RexB when it is co-expressed with RexA. All  
117 four lysogens, independent of their *rex* genotype, respond to the same extent to a fully inducing  
118 dose of UV ( $\sim 15 \text{ J/m}^2$ ) (see Figure 2A). Researchers other than Baek *et al.* (2003) may have  
119 missed this effect of Rex functions on UV induction since the historic dose used to induce  $\lambda$  has  
120 been  $\sim 15 \text{ J/m}^2$  (Coetzee & Pollard, 1974). We also find that expression of RexA and RexB from  
121 the arabinose operon can stimulate UV induction of a  $\lambda cI^+ rexA^- rexB^-$  lysogen (Figure 2B, open  
122 diamonds), confirming that the  $\lambda$  Rex functions can complement *in trans* to alter the basic  
123 behavior of the CI/Cro bistable switch when responding to lower levels of UV.

124  
125 **RexA enhances the spontaneous transition to the nonimmune state, as monitored by a  $P_R$**   
126 ***lacZ* reporter.** Our data show that the RexA protein stimulates lytic growth and phage  
127 production at suboptimal UV doses. We next asked whether the positive effect of RexA on  
128 prophage induction requires SOS-induced autocleavage of CI protein by determining whether  
129 RexA stimulates when CI repressor is not cleavable, i.e., contains the *ind1* mutation, or in RecA-  
130 mutant cells defective for the SOS response. We used the *cI857* temperature sensitive repressor  
131 allele for these experiments, since Toothman and Herskowitz (1980) previously noticed  
132 enhanced Rex-dependent effects in a *cI857* repressor background at temperatures where CI-  
133 mediated repression is active. Reichardt (Reichardt, 1975) showed that repressor protein levels  
134 are higher in *cI857* lysogens than in *cI^+* lysogens. This higher level of *cI857* protein is made in  
135 response to the autoregulatory properties of the  $P_{RM}$  promoter in order to maintain a constant

136 level of CI repression. Thus, more  $P_{RM}$  activated transcription will also generate more RexA/B  
137 protein and would account for enhanced RexA activity.  
138  
139 *E. coli* strains containing  $\lambda$  cI857 *indI* constructs with either the *cro*<sup>+</sup> or *cro*<sup>-</sup> alleles were  
140 modified to carry the four combinations of the *rexA* and *rexB* genes described in the legend of  
141 Figure 2A. These eight constructs contain only the phage immunity region as shown in Figure 3  
142 and are nonlethal; such constructs have been described by Svenningsen et al. (2005). Cultures of  
143 the *Cro*<sup>+</sup> strains were grown in L broth overnight, diluted and spread for individual colonies on  
144 MacConkey Lactose agar. The indicator plates were incubated at low temperature where CI857  
145 repressor is active. After 2-3 days, red papillae formed (Figure 4) in the bacterial colonies, which  
146 indicated that within the colony there was a clonal population of cells expressing  $\beta$ -galactosidase  
147 from  $P_R$ -*cII-lacZ* transcripts (see Figure 3). These results suggested that either mutations were  
148 occurring within the *cI* repressor gene allowing  $P_R$  transcription of *lacZ*, or that an epigenetic  
149 change had occurred to lift CI repression and allow *Cro* repression (Ptashne et al., 1980), i.e., the  
150 bistable switch had flipped from the immune state to the lytic state in these papillae. We found  
151 that colonies from the two strains having RexA function (LT1886 and LT1891) underwent more  
152 papillation than the two strains defective for RexA (LT1887 and LT1892) (Figure 4A), in  
153 experiments controlled for temperature and time. Since the non-cleavable *cI indI*-allele is present  
154 in this set of four strains, CI repressor autocleavage is not required for this Rex phenotype.  
155 Congruent with this observation, RexA-dependent patterns of papillation occur whether or not  
156 the strains are functional for RecA (compare Figure 4A vs 4B). Thus, RexA modulation of the  
157 bistable switch does not act through the SOS pathway of CI repressor autocleavage.

158 Confirmation that the rare papillae arise from epigenetic changes rather than from null mutations  
159 in the *cI* repressor gene is presented below.

160

161 **A functional Cro gene is required for Rex-dependent papillation.** The Cro repressor is an  
162 integral component of the bistable switch and is required for lytic growth (Folkmanis et al.,  
163 1977; Lee, Lewis, & Adhya, 2018). We found that the Rex-dependent effects on colony  
164 papillation are only observed when Cro function is present. When the *RecA*<sup>+</sup> reporter strains  
165 with the four combinations of *rexA* and *rexB* are defective for the Cro repressor, the papillation  
166 phenotype becomes independent of Rex function, with papillae occurring at a lower frequency  
167 than in the *Cro*<sup>+</sup> strains (Figure 4C). Sequence analysis of four red papillae from each of the Cro  
168 mutant strains revealed the presence of mutations in the *cI* gene which render them unable to  
169 maintain the immune state. In contrast, no *cI* mutations were found under *RecA*<sup>+</sup> *Cro*<sup>+</sup> conditions  
170 when four red papillae of each genotype were sequenced.

171

172 **RexA promotes stability of the nonimmune state.** Twenty different papillae from each of the  
173 eight strains shown in Figure 4A and 4B were struck on MacConkey Lactose agar for  
174 purification. When each of these purified red colonies is grown in L broth and then spread on  
175 MacConkey Lactose agar, rare white colonies appear among the red colonies on the plate. Thus,  
176 not only do immune (white) colonies contain papillae that have switched to the nonimmune (red)  
177 state, but once switched, they can also switch back to the immune (white) state. The percentage  
178 of switched white colonies within each culture was determined for each genotype (Figure 5). The  
179 most stable nonimmune state is in the cells with wild type RexA and RexB functions present.  
180 This is true whether cells are *recA*<sup>+</sup> or *recA*<sup>-</sup>, with 0.9% of *recA*<sup>+</sup> (Figure 5A) and 1.7% of *recA*<sup>-</sup>



181 (Figure 5B) cells switching to the immune state. RexA function exerts a strong positive effect to  
182 maintain the nonimmune state even in the absence of RexB, with 1.6% of *recA*<sup>+</sup> (Figure 5A) and  
183 2.7% of *recA*<sup>-</sup> (Figure 5B) cells in each culture reverting to the immune state. Cells lacking RexA  
184 function display higher rates of reversion to the immune state whether or not RexB is present and  
185 whether or not host RecA protein is present. We observed small differences due to removal of  
186 host RecA protein (see explanation in Fig S1 of Supporting Information), but our main  
187 observation, that the presence of RexA enhances stability of the lytic state of the bistable switch,  
188 is independent of RecA function.

189  
190 We carried out a similar analysis with Lac<sup>+</sup> red papillae arising in the RecA<sup>+</sup> *cro27* mutant strains  
191 LT1055, LT1395, LT1865, and LT1866, which contain the four combinations of RexA and  
192 RexB (see Figure 4C) and are defective for Cro function (Eisen, Brachet, Pereira da Silva, &  
193 Jacob, 1970). When the red colonies are grown in L broth and dilutions plated on MacConkey  
194 Lactose agar, no white colonies were found among thousands of red colonies. This indicates that  
195 the *cro27* Lac<sup>+</sup> colonies contain mutations in *cI*, which inactivate repressor function as discussed  
196 earlier. Our data indicate that red papillae due to *cI* mutations do occur but compose a small  
197 minority of the total papillae under Cro<sup>+</sup> conditions, whereas, under Cro<sup>-</sup> conditions, we found  
198 only *cI* mutations.

199  
200 **RexA<sup>+</sup> strains show earlier expression of the *P<sub>L</sub>* lytic promoter during the transition to the**  
201 **nonimmune state.** We looked for Rex-dependent transcription differences in expression of a  
202 reporter gene under control of the lytic promoter *P<sub>L</sub>* during transition of the bistable switch to the  
203 lytic state. Strains LT1657, LT1659, LT1895 and LT1897 are similar to those used for the

204 papillation experiment (Figure 4A) but contain a wildtype CI repressor ( $cI^{+}ind^{+}$ ); thus, in these  
205 strains, the nonimmune state is inducible by DNA damage but not by high temperature.

206  
207 A low dose of Mitomycin C (MC) was added to log phase cultures of these strains to cause DNA  
208 damage and trigger RecA\*-dependent autocleavage of CI repressor and activation of  $P_L$ - and  $P_R$ -  
209 mediated transcription. Once induced by MC, Cro expression from  $P_R$  results in repression of  
210  $P_{RM}$ , completing the switch from the lysogenic to the lytic state. The results are shown in Figure  
211 6.

212  
213 The effect of RexA and/or RexB function on expression of luciferase from the lytic promoter  $P_L$   
214 was monitored over time in the four different strains. The CI and Cro repressors were wild type  
215 in all cases. When RexA function is present and RexB is absent (Figure 6A, strain LT1895, open  
216 triangles), luciferase expression from the lytic promoter  $P_L$  occurs reproducibly earlier than when  
217 both RexA and RexB are absent (strain LT1897, open circles); this again demonstrates the  
218 positive effect of RexA on the transition to the lytic state. In contrast, when RexB function is  
219 present and RexA is absent (Figure 6B, strain LT1659, closed triangles), the kinetics of  
220 luciferase expression from  $P_L$  are similar to those observed when both RexA and RexB are  
221 absent. Thus, expression of RexB alone does not alter the timing of  $P_L$  activation. However,  
222 when both RexA and RexB proteins are present (Figure 6C, strain LT1657, closed circles),  $P_L$   
223 expression is delayed relative to the strain with only RexA function (open triangles). Thus, when  
224 present, RexB can inhibit RexA stimulation of luciferase from  $P_L$ . This experiment illustrates the  
225 independent and opposing effects that RexA and RexB have on the transition to the lytic state by  
226 affecting the timing of expression of the lytic  $P_L$  promoter. Note that the earliest time points

227 show no genotypic differences, suggesting that RexA does not act until DNA damage has  
228 occurred, CI repressor levels are reduced, and prophage induction has begun.

229

230 **Rex effects on spontaneous phage release of *cI857 ind1* lysogens:** We have shown that RexA  
231 function stimulates switching from the immune to the nonimmune state when Cro function is  
232 present by monitoring the expression of reporter genes from the major rightward ( $P_R$ ) and  
233 leftward ( $P_L$ ) lytic promoters in a defective prophage. We next looked for effects of Rex function  
234 on the bistable immunity switch in  $\lambda$  lysogens carrying a complete prophage.  $\lambda$  lysogens, when  
235 grown in culture, are relatively stable and rarely release phage. There is, however, a low level of  
236 phage release. Some of the phage released are rare *cI* mutants that have simply lost repressor  
237 activity, but the vast majority are genetically identical to the original prophage and arise from a  
238 cell in which  $\lambda$  had switched from the immune to the non-immune state; the two types are  
239 distinguishable by plaque morphology (Little & Michalowski, 2010). We tested the effects of  
240 RexA and/or RexB on this spontaneous phage release using *cI857* lysogens with the *ind1*  
241 mutation to block SOS-mediated prophage induction (see Figure 7).

242

243 We find that RexA enhances the transition to lytic growth. This RexA effect is most evident in  
244 the absence of RexB function (Figure 7, compare LT2320 and LT2321), where removal of RexA  
245 activity by mutation results in a >7-fold reduction in free phage titer. As observed previously,  
246 this RexA effect is nearly absent when RexB function is present: compare the *rexA*<sup>+</sup> LT1684  
247 with the *rexA* mutant LT2319; the levels of free phage in these two lysogens varies by <2-fold  
248 (see Figure 7). Clear plaques result from *cI* mutations that prevent lysogeny and account for less  
249 than 5% of the total phage yield for all genotypes. Thus, while demonstrating the positive effect

250 of RexA protein on the transition to lytic growth, the data also reveal that RexB protein  
251 antagonizes RexA function.

252

253 **Two-hybrid analysis of protein-protein interactions between RexA, RexB and the CI and**

254 **Cro repressors.** Protein-protein interactions occurring between RexA, RexB, and the phage

255 repressors CI and Cro might affect the operation of the bistable switch. Thus, we looked for such

256 interactions using the Bacterial Adenylate Cyclase Two Hybrid (BACTH) system (Karimova,

257 Gaudiard, Davi, Ouellette, & Ladant, 2017; Ouellette, Karimova, Davi, & Ladant, 2017). This

258 two-hybrid analysis is performed in an *E. coli cya* mutant lacking adenylate cyclase function,

259 using compatible plasmids expressing the T25 and T18 adenylate cyclase domains from

260 *Bordatella pertussis* fused to either the N- or C-terminus of proteins of interest. Interaction

261 between the two proteins being tested results in association of the two cyclase domains, giving

262 cyclase activity and consequent cAMP production. We previously used this system to show that

263 RexA and RexB interact with themselves and each other (Thomason et al., 2019). For that study

264 we generated eight plasmids that express the *rexA* and *rexB* genes fused in frame at either the N-

265 or C-terminus to each of two different cyclase domains. Here we made eight additional plasmids

266 by inserting the phage repressor genes, *cI* and *cro*, into the four cyclase vectors in the same

267 manner. We then introduced plasmid pairs to be tested for interaction into the *cya* mutant host,

268 BTH101 (Table S2 A-E). To ensure that only meaningful interactions were included in the

269 analysis, we first screened strains with the pairs of plasmids for the ability to confer growth on

270 minimal maltose (see pictures accompanying Table S2 A-E), since activation of the *mal* genes

271 depends strongly on cAMP (Raibaud, Vidal-Ingigliardi, & Kolb, 1991). We then measured  $\beta$ -

272 galactosidase production from the bacterial *lacZ* gene for each of these positive plasmid pairs,

273 since expression of the *lac* operon also requires cAMP for promoter activity (see Table 2). The  
274 results confirm that both RexA and RexB proteins interact with the CI repressor. For RexA and  
275 CI, only proteins with N-terminal cyclase tags allowed growth on maltose, suggesting that the C-  
276 terminal domains of these two proteins interact. It is known that CI repressor dimers form via an  
277 interaction domain located in the repressor C-terminus (Beckett, Burz, Ackers, & Sauer, 1993;  
278 Burz & Ackers, 1994). Thus, it is not surprising that these CI hybrid proteins form dimers with  
279 the cyclase tag on the N-terminus. Robust  $\beta$ -galactosidase values suggest that CI repressor with  
280 an N-terminal cyclase tag also interacts well with RexB protein. The cyclase tags can be at either  
281 end of RexB, which is an inner membrane protein, and predicted to have both N- and C- termini  
282 in the cytoplasm (Parma et al., 1992).  $\beta$ -galactosidase assays testing interaction of the Cro  
283 repressor with RexA and RexB proteins (Table 2) show about half the level of signal that we  
284 found for CI repressor-RexA/B interaction.

285  
286 The plasmids expressing the hybrid CI repressor confer immunity to  $\lambda$ , demonstrating that the  
287 CI fusion proteins are able to bind to the operator sites at the lytic promoters. Since binding to  
288 the operators might change protein-protein interactions and thus the  $\beta$ -galactosidase results, we  
289 tested a subset of the plasmid pairs in a derivative of the *cya* mutant strain having the phage  
290 operator sites present on the bacterial chromosome. However, we saw no significant differences  
291 in  $\beta$ -galactosidase levels with or without the repressor operator sites present (see Table 2,  
292 LT2333 vs LT2446 and LT2331 vs LT2447).

293  
294 **RexA is a non-specific DNA binding protein that forms stable complexes with CI oligomers**  
295 ***in vitro***. Our BACTH data demonstrate that RexA and RexB can associate with CI *in vivo*. To

296 study these interactions directly, we sought to purify RexA and RexB recombinantly from *E. coli*  
297 and test whether they could bind CI *in vitro*. RexA can be purified in milligram quantities as a  
298 soluble, monodispersed dimer (Figure 8A). We observe no evidence of subunit exchange in  
299 solution, suggesting that dimerization occurs during protein folding and the dimer remains stably  
300 associated. All attempts to purify RexB were unsuccessful, regardless of the tag used or how the  
301 protein was expressed.

302  
303 Analytical size exclusion chromatography (SEC) shows that purified CI repressor elutes earlier  
304 than the RexA dimer under the same experimental conditions (Figure 8B, gels I and II),  
305 consistent with the ability of CI to form larger oligomers (Bell, Frescura, Hochschild, & Lewis,  
306 2000; Dodd, Perkins, Tsemitsidis, & Egan, 2001; Révet, von Wilcken-Bergmann, Bessert,  
307 Barker, & Müller-Hill, 1999; Stayrook, Jaru-Ampornpan, Ni, Hochschild, & Lewis, 2008).  
308 When the assembled CI multimers are mixed with RexA dimers, a portion of RexA co-elutes  
309 with CI and both proteins are enriched in the heaviest, early fractions (8B, gel III versus I and II),  
310 indicating that RexA can form stable complexes with CI in solution.

311  
312 CI also forms complexes with double-stranded DNA (dsDNA) containing either the  $\lambda$   $O_L$  or  $O_R$   
313 operator sequences (Figure 8B, gels I, IV, and V and gels I, VIII, and IX), as evidenced by the  
314 leftward shift of the DNA bands when CI is added (Maniatis & Ptashne, 1973). Surprisingly,  
315 RexA also shifts to a larger species in the presence of these substrates (Figure 8B, gels II, IV,  
316 and VI and gels II, VIII, and X; Supporting Information Figure S1B, gels I, II, and III), implying  
317 that RexA also binds dsDNA. Further examination by filter binding shows that RexA  
318 preferentially associates with dsDNA compared to single-strand DNA (ssDNA) (Figure 8C,  $O_R$ 1-

319  $O_{R2}$  vs. ss $O_{R1-O_{R2}}$ ) but lacks sequence specificity for the  $\lambda$  operator region ( $O_{R1-O_{R2}}$  vs.  $O_{R1-O_{R2}}$   
320  $O_{R2}$  scrambled). RexA and CI form ternary complexes on both  $O_L$  and  $O_R$  operator DNA  
321 substrates with no significant changes to the overall elution profile of the individual components  
322 (Figure 8B), signifying that the abilities of RexA to bind CI and DNA are not mutually  
323 exclusive.

324  
325 We next assessed whether CI oligomerization is a prerequisite for RexA binding. Previous  
326 biochemical and crystallographic studies showed that the CI missense mutation D197G  
327 (Supporting Information Figure S2A) yields stable CI dimers that retain the ability to bind single  
328 operator sites but are impaired in higher order assembly and cooperative repressor functions  
329 (Stayrook et al., 2008; Whipple, Kuldell, Cheatham, & Hochschild, 1994). Purified CI D197G  
330 dimers form stable complexes with  $O_{L1-O_{L2}}$  operator DNA substrates (Supporting Information  
331 Figure S2B, gels I, IV, and V). However, we observe no significant shift in either protein when  
332 CI D197G is incubated with RexA (Figure S2B, gels II, IV, and VI). When operator DNA  
333 substrates are added to this mixture, the elution fractions overlay with positions of the individual  
334 RexA-DNA and CI D197G-DNA complexes (Figure S2B, gels I, III, V, and VII), arguing  
335 against the formation of a ternary complex. No stable complexes are formed between RexA and  
336 either the purified CI NTD or CTD domains, respectively (Figure S2C). Together these data  
337 argue that RexA is a non-specific DNA binding protein that can specifically bind assembled CI  
338 oligomers.

339

340 **Discussion**

341 The two basic components of the phage  $\lambda$  bistable switch are the CI and Cro repressor proteins  
342 that bind to operator sites flanking the major lytic promoters,  $P_L$  and  $P_R$ , to regulate gene  
343 expression. RexA and RexB proteins are certainly not required for the  $\lambda$  bistable switch;  
344 however, our results suggest that they are accessory factors able to modulate switch activity,  
345 providing an additional layer of regulation that refines the ability of the virus to maintain  
346 lysogeny or exit from the lysogenic state. RexA potentiates induction when the inducing signal is  
347 low by stabilizing the transition to the lytic state. Some of our experiments show an antagonistic  
348 effect of RexB on this RexA-mediated activity (Figures 6,7). Induction is optimal when both  
349 RexA and RexB are present (Figure 2), while lysogens mutant for both RexA and RexB are the  
350 least prone to transition to the non-immune state (Figures 2, 4, 7). In this way, RexA and RexB  
351 act together as two opposing forces to modulate the switch between lysogenic and lytic growth,  
352 reducing stochasticity in the switch (Arkin, Ross, & McAdams, 1998; Bednarz, Halliday,  
353 Herman, & Golding, 2014; Golding, 2011). Once the bistable switch has transitioned to the non-  
354 immune state, our data show that only RexA is necessary to stabilize the lytic configuration and  
355 reduce the tendency to return to the immune state (Figure 5). Since RexA is not expressed when  
356 the switch is in the nonimmune state, we presume that some  $P_{RM}$  expression must be required  
357 before RexA can act in the experiments shown in Figure 5 (see Figure 9).

358  
359 Two types of models may explain Rex effects: Rex proteins either act to directly affect  $\lambda$   
360 behavior, or the Rex proteins alter cell physiology, and this altered physiology in turn affects  $\lambda$   
361 behavior. Our data support the first model, since we demonstrate a direct interaction between the  
362 Rex proteins and the phage repressors (Table 2), as well as between the Rex proteins and the  
363 phage replication proteins O and Ren (Table S1). Although the Rex system can have energetic



364 effects on the cell, those effects require both Rex proteins (Matz et al., 1982; Parma et al., 1992;  
365 Snyder & McWilliams, 1989). Data presented here clearly show that RexA alone exerts an effect  
366 on the bistable switch.

367  
368 Our genetic and biochemical analyses demonstrate that RexA physically interacts with the CI  
369 repressor both *in vivo* and *in vitro*. *In vivo*, this interaction was confirmed in the bacterial two-  
370 hybrid system as measured by the ability to activate cAMP-dependent promoters. These results  
371 suggest that the two proteins can interact via their C-terminal domains. *In vitro*, purified RexA  
372 dimers form stable complexes with assembled CI multimers and also bind both dsDNA and  
373 ssDNA non-specifically. RexA and CI form ternary complexes on DNA substrates containing  $\lambda$   
374 operator sites, arguing that RexA does not directly inhibit CI intrinsic DNA binding capability,  
375 nor does it compete for the same binding sites, which would restrict repressor access. We see no  
376 evidence of RexA-mediated CI cleavage analogous to that mediated by RecA protein. We  
377 hypothesize that *in vivo*, RexA, facilitated by its interactions with DNA and CI, is present at the  
378  $\lambda P_L$  and  $P_R$  promoters regulated by CI repressor, where it reduces the ability of CI to establish  
379 tight repression, thus pushing the system toward the lytic state (see Figure 10).

380  
381 RexB is an integral inner membrane protein with four predicted transmembrane segments and  
382 three charged cytoplasmic loops; thus, these loops are poised to associate with different binding  
383 partners in the cytoplasm (Figure 11) (Krogh, Larsson, von Heijne, & Sonnhammer, 2001;  
384 Parma et al., 1992). We find an interaction between RexB and CI repressor in the two-hybrid  
385 study (Table 2), suggesting that in a repressed lysogen, CI repressor, bound at its operator sites,  
386 may be localized at the inner surface of the cytoplasmic membrane via non-covalent interactions

387 with RexB. CI requires an N-terminal cyclase tag to interact with RexB, however, the cyclase tag  
388 on RexB can be at either the N- or C-terminus. Thus, the CI-RexB interaction likely occurs via  
389 the RexB central cytoplasmic loop (Figure 11). We previously showed that RexA and RexB  
390 physically interact *in vivo* (Thomason et al., 2019); the strength of the RexA-RexB interaction is  
391 similar to that of RexA with CI (Table 2). The antagonistic effect of RexB on RexA activity may  
392 occur because RexB association with CI bound to the operator sites at the inner membrane  
393 makes CI less available to RexA, deepening repression. Alternatively, RexB may titrate RexA,  
394 reducing the amount of free RexA protein available to interact with CI and DNA. Regardless of  
395 how RexB acts at the molecular level, RexA and RexB must function together to optimize  
396 modulation of the CI/Cro bistable switch, with each protein having independent and  
397 complementary effects as the phage switches from lysogenic development to lytic growth (see  
398 Figure 10).

399  
400 RexB continues to be transcribed from  $P_{LIT}$  after prophage induction as the lytic promoters  $P_L$   
401 and  $P_R$  become active (Fig. 1). The genes encoding the phage DNA replication functions, O and  
402 P, are transcribed from  $P_R$ . Our two-hybrid analysis (Table S1) suggests a strong physical  
403 interaction between the RexB and  $\lambda$  O proteins, consistent with the observation that intracellular  
404 RexB stabilizes O protein *in vivo* (MacHattie, 1985; Schoulaker-Schwarz, Dekel-Gorodetsky, &  
405 Engelberg-Kulka, 1991). Interaction between RexB and O could tether the phage replication  
406 complex to the inner membrane, with RexB serving as a central hub to localize phage DNA  
407 replication as well as to coordinate the transition from lysogeny to lytic growth (see  
408 Supplementary Results and Discussion).

409

410 This work has defined novel and complementary roles for the phage  $\lambda$  RexA and RexB proteins  
411 in the switch from lysogeny to lytic growth. Previously, the Rex system was thought to function  
412 solely in the lysogenic state to exclude infecting phages such as T4rII by triggering cellular  
413 energetic defects (Benzer, 1955; Gussin & Peterson, 1972; Matz et al., 1982; Parma et al., 1992).  
414 Given its location at the inner membrane, we suspect that the Rex system may sense and respond  
415 to the energetic state of the cell, and exclusion may occur as a byproduct.

416  
417 Despite serving as the basis for pioneering studies in molecular biology and genetics (Benzer,  
418 1955; Crick, Barnett, Brenner, & Watts-Tobin, 1961), the Rex system has long been considered a  
419 unique outlier among bacteriophage. The explosion of genome sequencing in recent years,  
420 however, has unearthed putative *rex*-like genes in numerous temperate *Mycobacterium* and  
421 *Gordonia* phages (Russell & Hatfull, 2017). Homologs from phages Sbash, CarolAnn, and  
422 Butters confer a broad viral defense that mirrors the Rex exclusion behavior in  $\lambda$  (Gentile et al.,  
423 2019; Mageeney et al., 2020; Montgomery, Guerrero Bustamante, Dedrick, Jacobs-Sera, &  
424 Hatfull, 2019). These genes are organized in tandem in a single operon that is often directly  
425 adjacent to a CI-like repressor gene, raising the tantalizing possibility that other bacterial viruses  
426 also use these analogous systems to fine tune the balance between lysogeny and lytic growth.  
427 Future studies will determine the generality of this mechanism and continue the legacy of  
428 bacteriophage  $\lambda$  (Golding, 2016) and the Rex system as important experimental platforms.

429

## 430 **Experimental Procedures**

431 *Materials and Media:* Bacterial cultures were grown in L broth containing 10g tryptone, 5g yeast  
432 extract and 5g NaCl per liter, and on L plates, which contained ingredients above and 1.5%

433 Difco agar. Cultures for plating phage were grown to exponential phase in tryptone broth  
434 containing 10g tryptone, 5g NaCl, and 10mM MgSO<sub>4</sub> per liter. Phage stocks were maintained in  
435 TMG, containing 10mM Tris base, 10 mM MgSO<sub>4</sub> and 0.01% gelatin, pH7.4. Phage were  
436 enumerated on tryptone plates 10g tryptone and 5g NaCl per liter using 0.25 ml of fresh plating  
437 cultures mixed with 2.5 ml melted tryptone top agar (0.7% agar) containing 10 g tryptone and 5  
438 g NaCl. MacConkey Lactose agar medium was from Difco and contained 1% lactose and 1.35%  
439 agar. Dilutions of bacteria were made in M9 Salts, dilutions of phage were made in TMG.

440  
441 Bacterial strains used for most experiments are in Table 1, those used for the BACTH analysis  
442 are in Table 2. Strains were constructed using a combination of recombineering and P1  
443 transduction methods (Thomason, Costantino, & Court, 2007; Thomason, Sawitzke, Li,  
444 Costantino, & Court, 2014). Sequences of single-strand oligonucleotides used for  
445 recombineering are available upon request. The mutations to inactivate *rexA* and *rexB*  
446 individually or together are described in Thomason et al. (2019). Briefly, most of each gene was  
447 removed and replaced with the open reading frame of a selectable drug marker, but two regions  
448 were left intact: the distal end of the *rexA* gene, which contains the *P<sub>LIT</sub>* promoter; and the distal  
449 end of the *rexB* gene, which is necessary for optimal transcriptional termination at the intrinsic  
450 terminator for the immunity region, *T<sub>IMM</sub>*, which is immediately downstream of *rexB*. For  
451 simplicity these mutations are simply indicated in the strain list (Table 1) as *rexA* and *rexB* drug  
452 marker replacements. Once the *rex* mutations were inserted in the intact prophage, lysogenic  
453 candidates were screened by cross-streaking against a *cI* mutant phage, and those that displayed  
454 immunity were further screened with a PCR test (Powell, Rivas, Court, Nakamura, &  
455 Turnbough, 1994) to identify monolysogens, which were used for all analyses.

456  
457 *UV induction of  $\lambda$  lysogens:* Overnight cultures of lysogens and strain A584 for titering released  
458 phage were grown in LB at 32 C overnight. Lysogens were diluted 1/500 into 35 ml LB and  
459 grown in a 32°C shaking water bath to an OD<sub>600</sub> of approximately 0.15. Then 30 ml of the cells  
460 was harvested by centrifugation and suspended gently in 1 ml of TMG. 29 ml TMG was added,  
461 and the wash and suspension steps repeated. After the second wash, 14 ml TMG was added to  
462 the cells, for a total of 15 ml, resulting in a two-fold concentration and  $\sim 2 \times 10^8$  cells/ml in TMG.  
463 The washed lysogenic cells were placed in a sterile empty petri dish and working under a red  
464 light, were irradiated with UV for the indicated amount of time. Every 5 seconds, 100  $\mu$ l was  
465 withdrawn and dispensed into a sterile Eppendorf tube, out to 30 sec. 10 microliters from each  
466 Eppendorf was added to 10ml LB in a 50ml baffled flask. Cells were incubated in the dark in a  
467 37°C shaking water bath for two hours. Serial dilutions of the resulting lysates were made and 10  
468  $\mu$ l of each dilution was spotted on a lawn of A584 poured onto TB plates; the dilutions were  
469 stored overnight. The next day the approximate titers of each dilution were estimated from the  
470 spot plates, and more accurate titers determined as follows: 50 or 100 $\mu$ l of the appropriate phage  
471 dilution was mixed with 0.25 ml A584 in a small plating tube, this cell-phage mix remained at  
472 room temperature for at least 10 min, then 2.5 ml melted TB top agar was added, and the  
473 contents immediately poured on a TB plate. Once the top agar hardened plates were inverted and  
474 incubate overnight at 37°C. The next day, the number of plaques on each plate was counted and  
475 titers were determined for each UV time point. Plating bacteria were made by diluting the A584  
476 overnight 33-fold into five ml tryptone broth containing 10mM MgSO<sub>4</sub>, growing for 2.5 hrs at  
477 32°C with aeration, after which five ml of TMG (10mM Tris 10mM MgSO<sub>4</sub> 10mM gelatin) was  
478 added. This thin culture was used to assay released phage.

479  
480 *Papillation assays:* The papillation of strains carrying the dual  $P_L P_R$  reporters with a *cI857 ind1*  
481 allele and *rexA* and *rexB* mutations was examined by plating appropriate dilutions of fresh LB  
482 overnight cultures on MacConkey-Lactose to obtain isolated single colonies. MacConkey-  
483 Lactose petri plates were incubated at 32-34°C until papillae arose within individual colonies  
484 (Fig. 4). All plates in a set were incubated under identical conditions. Once papillae developed,  
485 the plates were photographed, and the pointed end of a small pipette tip was used to pick  
486 individual papillae and purify them to single red colonies on MacConkey-Lactose; these plates  
487 were incubated at 30°C degrees. Twenty-four independent red colony isolates of each genotype  
488 were propagated in this fashion for the  $RecA^+$  strains, and eighteen for the  $RecA^-$ . Once these red  
489 colonies were purified away from white colonies, overnight cultures from the red colonies were  
490 grown in L broth at 30°C and plated on MacConkey-Lactose solid agar for single colonies. After  
491 overnight incubation at 30°C, colonies were counted for each independent culture and the  
492 number of red and white colonies tabulated. The percentage of white colonies among reds was  
493 determined for each genotype (Fig. 5). In every case, a few colonies of each genotype failed to  
494 give any white colonies. Such non-reverting red colonies likely contain mutations in the *cI*  
495 repressor gene, which generate inactive CI repressor protein; these were not included in the  
496 analysis. The final number of colonies analyzed is indicated in the legend to Fig. 5. Numerical  
497 data are shown in Supporting Information Table S4; these data were used to generate the bar  
498 graphs shown in Fig. 5A and 5B.

499  
500 *Kinetics of induction monitoring  $P_L N-luc$  reporter.* Overnight cultures of strains LT1657,  
501 LT1659, LT1895, and LT1897 were grown in L broth from single colonies. Cultures were

502 diluted 500-fold into 25ml L broth in 125 ml baffled flasks in a 37°C shaking water-bath. After  
503 1.5 hrs, 1.0 ml samples were withdrawn from the flasks and 3ng/ml Mitomycin C (MC) was  
504 added to each flask. For these and subsequent samples, taken every 30 min, the A600 was  
505 determined, and luciferase assays were performed immediately, using the Promega Luciferase  
506 Assay System (catalog no. E1500) according to the company's directions. Culture aliquots in L  
507 broth (0.1ml) were added directly to 0.4 ml of Cell Culture Lysis Reagent with 2.5mg/ml BSA  
508 and 1.25 mg/ml lysozyme. Cell lysate (25 $\mu$ l) was mixed with 0.1ml of luciferase substrate  
509 (Promega Luciferase Assay Reagent, catalog no. E151A), incubated for 2.0 min and read in a  
510 BD Pharmingen Monolight 3010 single sample luminometer for 10s. Each sample was assayed  
511 in duplicate. The relative light unit (RLU) was normalized to the A600. Three biological  
512 replicates of the experiment were performed, one representative experiment is shown (Figure 6).

513  
514 *Analysis of spontaneous phage release in lysogenic cultures:* Lysogenic cells were first washed  
515 to remove viral particles: five ml overnight cultures of lysogenic strains were pelleted in the  
516 Sorvall at 6700rpm for 7min. Pellets were suspended in 1ml TMG, additional TMG was added to  
517 ~25ml total volume, and suspensions were mixed by vortexing. Cells were again pelleted,  
518 suspended in TMG, and pelleted as before, then the cell pellet was suspended at the original 5ml  
519 volume and diluted 1/400 into 10ml L broth in 125ml baffled flasks. Aliquots (1ml) of each  
520 genotype were removed and filtered with a 0.2 $\mu$ m filter; 0.3ml of the filtered lysate was plated  
521 on tryptone plates using C600 as host to determine initial phage titer, which was negligible in all  
522 cases. Cultures were incubated with shaking in a 32°C water bath until the OD<sub>600</sub> was 0.2-0.3.  
523 Final OD<sub>600</sub> was determined for each culture and the number of viable cells per ml was  
524 determined from colony counts obtained by plating dilutions of lysogenic cultures on L agar petri

525 plates and incubating plates overnight at 32°C. 1.5ml each culture was removed and filtered with  
526 a 0.2µm filter, three 10-fold serial dilutions into TMG were made for each of the filtered lysates.  
527 0.25ml of C600 plating culture was mixed with 2.5ml melted tryptone top agar and poured onto  
528 tryptone petri plates. Once plates hardened, 10µl of the undiluted lysate and each dilution was  
529 spotted on the surface of the lawn. Plaques in each 10µl spot were counted to determine  
530 approximate titers of the cultures. These approximations were used to guide the selection of  
531 appropriate dilutions of filtered lysates to determine an accurate number of phage particles in the  
532 supernatants. Both clear ( $c^-$ ) and turbid ( $c^+$ ) plaques were enumerated. Clear plaques result from  
533 mutations in the phage that prevent lysogeny and accounted for less than 5% of the total phage  
534 yield for all genotypes. Numerical data are shown in Supporting Information Table S5.

535  
536 *Two-hybrid analysis:* The Bacterial Adenylate Cyclase Two Hybrid System Kit (BACTH Kit)  
537 from Euromedex ([www.euromedex.com](http://www.euromedex.com)) was used to look for protein-protein interactions  
538 between the RexA and RexB proteins and the two phage repressor proteins in *E. coli*.  
539 Construction of *rexA* and *rexB* plasmids was previously described (Thomason 2019).  
540 Recombineering was used to insert the *cI* and *cro* repressor genes into the four two-hybrid  
541 vectors: the low-copy KanR pKT25 and pKNT25 plasmids with the T25 adenylate cyclase  
542 domain on the N- and C-terminal domains fused in frame to the gene of interest, respectively.  
543 The two repressor genes were also inserted into the high-copy AmpR pUT18 and pUT18C  
544 plasmids, with the T18 adenylate cyclase domain fused in frame to the C- and N-terminal  
545 domains of the gene of interest, respectively. For BACTH complementation assays, various pairs  
546 of T25 (KanR) and T18 (AmpR) plasmids were introduced into the *cya* mutant strain BTH101  
547 by co-electroporation. The BTH101 derivatives containing these plasmid pairs are listed in Table



548 S2 A-E of the Supporting Information. After outgrowth, 10 $\mu$ l drops of ten-fold serial dilutions of  
549 the transformed cells were spotted onto petri plates containing L agar with kanamycin (30 $\mu$ g/ml),  
550 ampicillin (100 $\mu$ g/ml) and X-gal (50 $\mu$ g/ml). Plates were incubated at 32°C overnight. Colonies  
551 from these petri plates were subsequently purified on M63 minimal maltose solid agar containing  
552 the same drugs plus 1mM IPTG. Growth on minimal maltose indicated cAMP-dependent sugar  
553 utilization and thus a positive interaction between the two phage proteins being tested; such  
554 interaction results in interaction of the two fused adenylate cyclase domains (Supporting  
555 Information Table S1). Out of 51 strains tested, 13 grew on minimal maltose, and  $\beta$ -  
556 galactosidase assays were used to provide an estimate of the strength of interaction for these  
557 pairs of plasmid-borne phage proteins (Table 2). For these assays, colonies picked from the  
558 minimal maltose agar plates were used to generate overnight cultures grown in L broth  
559 containing the same antibiotics at the same concentrations. The day of the assay, cells were  
560 diluted 100-fold into L broth lacking antibiotics and  $\beta$ -galactosidase assays were done according  
561 to Thomason et al. (2019). At least three independent cultures were measured for each plasmid  
562 pair. A similar protocol was followed for the phage O, P, and Ren proteins (see Supporting  
563 Information Results and Discussion and Table S1).

564  
565 *Cloning, expression, and purification of bacteriophage  $\lambda$  RexA and CI constructs:* DNA  
566 encoding the full-length bacteriophage  $\lambda$  RexA (UniProt P68924) and CI (UniProt P03034)  
567 proteins were codon optimized for *E. coli* expression and synthesized commercially by Bio Basic  
568 Inc. The DNA encoding full-length RexA (residues 1-279) was amplified by PCR and cloned  
569 into pET21b, introducing a 6xHis tag at the C-terminus. DNA encoding full-length CI (residues  
570 1-237), as well as its N-terminal DNA binding domain (NTD, residues 1-93) and the C-terminal

571 multimerization domain (CTD, residues 133-237), was separately amplified by PCR and cloned  
572 into pET21b. The D197G mutation was introduced into full-length CI via the Quikchange  
573 Mutagenesis Kit (Agilent). All RexA and CI constructs were transformed into BL21(DE3) cells,  
574 grown at 37°C in Terrific Broth to an OD<sub>600</sub> of 0.7-0.9, and then induced with 0.3 mM IPTG  
575 overnight at 19°C. Cells were pelleted, washed with nickel loading buffer (20 mM HEPES pH  
576 7.5, 500 mM NaCl, 30 mM imidazole, 5% glycerol (v:v), and 5 mM β-mercaptoethanol), and  
577 pelleted a second time. Pellets were typically frozen in liquid nitrogen and stored at -80°C for  
578 later use.

579  
580 Thawed 500 ml pellets of each RexA and CI construct were resuspended in 30 ml of nickel  
581 loading buffer supplemented with 5 mg DNase, 5 mM MgCl<sub>2</sub>, 10 mM PMSF, and a Roche  
582 complete protease inhibitor cocktail tablet. Lysozyme was then added to a concentration of 1  
583 mg/ml and the mixture was incubated for 10 minutes rocking at 4°C. Cells were disrupted by  
584 sonication and the lysate was cleared via centrifugation at 13 000 rpm (19 685 g) for 30 minutes  
585 at 4°C. The supernatants were each filtered through a 0.45 μm filter, loaded onto a 5 ml HiTrap  
586 chelating column charged with NiSO<sub>4</sub>, washed with nickel loading buffer, and then eluted via an  
587 imidazole gradient from 30 mM to 1 M. Pooled RexA fractions were further dialyzed overnight  
588 at 4°C into S loading buffer (20 mM HEPES pH 7.5, 50 mM NaCl, 1 mM EDTA, 5% glycerol  
589 (v:v), and 1 mM DTT) and then loaded onto a 5 ml HiTrap SP column equilibrated with S  
590 loading buffer. The SP column was washed in the same buffer and then RexA was eluted with a  
591 NaCl gradient from 50 mM to 1 M. Peak fractions from the SP column were pooled,  
592 concentrated, and further purified by size exclusion chromatography (SEC) using a Superdex 75

593 16/600 pg column. RexA protein was exchanged into a final buffer of 20mM HEPES pH 7.5,  
594 150mM KCl, 5 mM MgCl<sub>2</sub>, and 1mM DTT during SEC and concentrated to 10-70 mg/ml.

595  
596 The chelating column elution fractions containing CI protein were pooled, concentrated, and  
597 further purified directly by SEC using either a Superdex 200 16/600 pg column (full-length  
598 wildtype) or Superdex 75 16/600 pg column (D197G mutant, NTD, and CTD). CI proteins were  
599 exchanged into a final buffer of 20mM HEPES pH 7.5, 150mM KCl, 5 mM MgCl<sub>2</sub>, and 1mM  
600 DTT during SEC and concentrated to 10-40 mg/ml.

601  
602 *Size exclusion chromatography coupled to multi-angle light scattering (SEC-MALS):* Purified  
603 RexA at 4 mg/mL was subjected to size-exclusion chromatography (SEC) using a Superdex 75  
604 10/300 column (GE) equilibrated in SEC buffer (20 mM HEPES pH 7.5, 150 mM KCl, 5 mM  
605 MgCl<sub>2</sub>, and 1mM DTT). The column was coupled to a static 18-angle light scattering detector  
606 (DAWN HELEOS-II) and a refractive index detector (Optilab T-rEX) (Wyatt Technology). Data  
607 were collected continuously at a flow rate of 0.5 mL/min. Data analysis was carried out using the  
608 program Astra VI. Monomeric BSA at 4 mg/mL (Sigma) was used for normalization of the light  
609 scattering detectors and data quality control.

610  
611 *Preparation of DNA substrates from oligonucleotides:* All DNA oligonucleotides were  
612 synthesized commercially by Integrated DNA Technologies (IDT). Lyophilized single-stranded  
613 oligonucleotides were resuspended to 1 mM in 10 mM Tris-HCl and 1 mM EDTA and stored at  
614 minus 20°C until needed. For filter binding, single-stranded oligonucleotides were 5' end-labeled  
615 with [ $\gamma$ 32P]ATP using polynucleotide kinase (New England Biolabs) and then purified on a P-30

616 spin column (BioRad) to remove unincorporated label. Duplex DNA substrates were prepared by  
617 heating equimolar concentrations of complementary strands (denoted as ‘us’ and ‘ls’ indicating  
618 upper and lower strands) to 95°C for 15 minutes followed by cooling to room temperature  
619 overnight and then purification on an S-300 spin column (GE) to remove single stranded DNA.  
620 Sequences for all substrates can be found in Supporting Information Table S3.

621  
622 *Analytical size exclusion chromatography (SEC):* 50 µl samples containing full-length CI protein  
623 at 125 µM, RexA protein at 125 µM, or a 1:1 mixture of both proteins was incubated for 15  
624 minutes at room temperature and analyzed by SEC using a Superdex 200 PC 3.2 column (GE  
625 Healthcare) equilibrated in SEC buffer (20 mM HEPES, pH7.5, 150 mM KCl, 5 mM MgCl<sub>2</sub>, and  
626 1mM DTT). To assess CI and RexA interactions with DNA, samples containing the annealed  
627 double-stranded DNA substrates OR<sub>1</sub>-OR<sub>2</sub> or OL<sub>1</sub>-OL<sub>2</sub> were also prepared at 2:1.2 protein to  
628 DNA molar ratio. Individual DNA substrates were injected alone at a concentration of 75 µM for  
629 comparison. All eluted fractions were further analyzed by SDS-PAGE using 4 –20% gradient  
630 gels, and then silver-stained to visualize DNA and Coomassie-stained to visualize protein.  
631 Samples were similarly prepared for the D197G, NTD, and CTD CI constructs but were  
632 analyzed using a Superdex 75 PC 3.2 column (GE Healthcare) equilibrated in SEC buffer.

633  
634 *Filter binding:* Filter binding assays were carried out in buffer containing 25 mM MES (pH 6.5),  
635 2.0 mM MgCl<sub>2</sub>, 0.1 mM DTT, 0.01 mM EDTA, and 40 µg/mL BSA. Binding was performed  
636 with wildtype RexA at 30°C for 10 min in a 30 µL reaction mixture containing 14.5 nM  
637 unlabeled DNA and 0.5 nM labelled DNA. Samples were filtered through KOH-treated  
638 nitrocellulose filters (Whatman Protran BA 85, 0.45 µm) using a Hoefer FH225V filtration

639 device for approximately 1 min. Filters were subsequently analyzed by scintillation counting on  
640 a 2910TR digital, liquid scintillation counter (PerkinElmer). All measured values represent the  
641 average of at least three independent experiments (mean  $\pm$  standard deviation) and were  
642 compared to a negative control to determine fraction bound.

643

644 **Acknowledgements:** We thank Brenda Shafer for expert technical assistance, Alison Rattray for  
645 statistical analyses, and Nina Costantino for critical reading of the manuscript. L.C.T. thanks  
646 Nathan Brown for insightful discussions about the Rex system. We also thank Richard  
647 Fredrickson and Jonathan Summers at NCI-Frederick Scientific Publications, Graphics, and  
648 Media for expert assistance with photography, and M. Spencer, N. Shrader, T. Hartley, and K.  
649 Pike from the CRTP Genomics Laboratory of the Frederick National Lab for Sanger sequencing.  
650 This work was supported, in part, by the Intramural Research Program of the National Institutes  
651 of Health, National Cancer Institute, Center for Cancer Research. This project has been funded  
652 in whole or in part with federal funds from the National Cancer Institute, National Institutes of  
653 Health, under contract HHSN26120080001E. The content of this publication does not  
654 necessarily reflect the views or policies of the Department of Health and Human Services, nor  
655 does mention of trade names, commercial products, or organizations imply endorsement by the  
656 U.S. Government. This research was supported [in part] by the Intramural Research Program of  
657 the NIH, National Cancer Institute, Center for Cancer Research. M.C.A. is supported by a NIFA  
658 predoctoral fellowship (2020-67034-31750).

659

660 **Author Contributions:** L.C.T. performed genetic experiments and wrote the manuscript, C.C.  
661 performed genetic experiments. C.J.S., C.J.H., and M.C.A. performed biochemistry experiments,

662 J.S.C. designed biochemical experiments, provided guidance and financial support, and edited  
663 the manuscript. D.L.C. provided financial support and guidance and edited the manuscript.

664

665 **Data Availability Statement.**

666 The data that support the findings of this study are available from the corresponding author upon  
667 reasonable request.

668 **Table 1. *Escherichia coli* K-12 Strains**

| Strain | Relevant Genotype                                                                                                           | Reference/construction   |
|--------|-----------------------------------------------------------------------------------------------------------------------------|--------------------------|
| A584   | YMC [ <i>trp::Tn10 tyrT (supF)</i> ]                                                                                        | D. Ennis via F. W. Stahl |
| C600   | <i>tonA21 thi-1 thr-1 leuB6 lacY1 rfbC1 fhuA1 glnV44 (supE)</i>                                                             | D. Court laboratory      |
| LT445  | MG1655( $\lambda$ <i>cI<sup>+</sup> rexB<sup>+</sup> rexA<sup>+</sup></i> ) monolysogen                                     | Thomason et al., 2019    |
| LT1055 | MG1655 $\Delta$ <i>lacI-kan luc-N pLoL rexB<sup>+</sup> rexA<sup>+</sup> cI857ind1 pRoR cro27 cII-lacZYA</i>                | this work                |
| LT1395 | MG1655 $\Delta$ <i>lacI-kan luc-N pLoL rexB<sup>+</sup> rexA&lt;&gt;cat cI857ind1 pRoR cro27 cII-lacZYA</i>                 | this work                |
| LT1657 | MG1655 $\Delta$ <i>lacI-kan luc-N pLoL rexB<sup>+</sup> rexA<sup>+</sup> cI<sup>+</sup> pRoR cro<sup>+</sup> cII-lacZYA</i> |                          |
| LT1659 | MG1655 $\Delta$ <i>lacI-kan luc-N pLoL rexB<sup>+</sup> rexA&lt;&gt;cat cI<sup>+</sup> pRoR cro<sup>+</sup> cII-lacZYA</i>  |                          |
| LT1676 | MG1655( $\lambda$ <i>cI<sup>+</sup> ind<sup>+</sup> rexB<sup>+</sup> rexA&lt;&gt;cat</i> ) monolysogen                      | Thomason et al., 2019    |
| LT1677 | MG1655( $\lambda$ <i>cI<sup>+</sup> ind<sup>+</sup> rexB&lt;&gt;cat rexA<sup>+</sup></i> ) monolysogen                      | Thomason et al., 2019    |
| LT1678 | MG1655( $\lambda$ <i>cI<sup>+</sup> ind<sup>+</sup> (rexAB)&lt;&gt;cat</i> ) monolysogen                                    | Thomason et al., 2019    |

|        |                                                                                                                                                    |           |
|--------|----------------------------------------------------------------------------------------------------------------------------------------------------|-----------|
| LT1684 | MG1655( $\lambda$ <i>cI857 ind1 rexB<sup>+</sup> rexA<sup>+</sup></i> )<br><i>lamB</i> <> <i>kan</i> monolysogen                                   | this work |
| LT1865 | MG1655 $\Delta$ <i>lacI-kan luc-N pLoL</i><br><i>rexB</i> <> <i>cat rexA<sup>+</sup> cI857ind1 pRoR cro27</i><br><i>cII-lacZYA</i>                 | this work |
| LT1866 | MG1655 $\Delta$ <i>lacI-kan luc-N pLoL (rexB-</i><br><i>rexA</i> <> <i>cat) cI857ind1 pRoR cro27 cII-</i><br><i>lacZYA</i>                         | this work |
| LT1886 | MG1655 $\Delta$ <i>lacI-kan luc-N pLoL rexB<sup>+</sup></i><br><i>rexA<sup>+</sup> cI857 pRoR cro<sup>+</sup> cII-lacZYA</i>                       | this work |
| LT1887 | MG1655 $\Delta$ <i>lacI-kan luc-N pLoL rexB<sup>+</sup></i><br><i>rexA</i> <> <i>cat cI857ind1 pRoR cro<sup>+</sup> cII-</i><br><i>lacZYA</i>      | this work |
| LT1891 | MG1655 $\Delta$ <i>lacI-kan luc-N pLoL</i><br><i>rexB</i> <> <i>cat rexA<sup>+</sup> cI857ind1 pRoR cro<sup>+</sup></i><br><i>cII-lacZYA</i>       | this work |
| LT1892 | MG1655 $\Delta$ <i>lacI-kan luc-N pLoL (rexB-</i><br><i>rexA</i> <> <i>cat) cI857ind1 pRoR cro<sup>+</sup> cII-</i><br><i>lacZYA</i>               | this work |
| LT1895 | MG1655 $\Delta$ <i>lacI-kan luc-N pLoL</i><br><i>rexB</i> <> <i>cat rexA<sup>+</sup> cI<sup>+</sup> pRoR cro<sup>+</sup> cII-</i><br><i>lacZYA</i> |           |
| LT1897 | MG1655 $\Delta$ <i>lacI-kan luc-N pLoL (rexB-</i><br><i>rexA</i> <> <i>cat) cI<sup>+</sup> pRoR cro<sup>+</sup> cII-lacZYA</i>                     |           |
| LT2063 | LT1886 $\Delta$ ( <i>srlA- recA</i> )::Tn10                                                                                                        | this work |



|        |                                                                                                                            |           |
|--------|----------------------------------------------------------------------------------------------------------------------------|-----------|
| LT2064 | LT1887 $\Delta$ ( <i>srlA- recA</i> )::Tn10                                                                                | this work |
| LT2065 | LT1891 $\Delta$ ( <i>srlA- recA</i> )::Tn10                                                                                | this work |
| LT2066 | LT1892 $\Delta$ ( <i>srlA- recA</i> )::Tn10                                                                                | this work |
| LT2109 | LT1678 $P_{BAD}$ -( <i>rexA</i> <sup>+</sup> <i>rexB</i> ) <sup>+</sup>                                                    | this work |
| LT2319 | MG1655( $\lambda$ <i>cI857 ind1 rexB</i> <sup>+</sup> <i>rexA</i> <> <i>cat</i> )<br><i>lamB</i> <> <i>kan</i> monolysogen | this work |
| LT2320 | MG1655( $\lambda$ <i>cI857 ind1 rexB</i> <> <i>cat rexA</i> <sup>+</sup> )<br><i>lamB</i> <> <i>kan</i> monolysogen        | this work |
| LT2321 | MG1655( $\lambda$ <i>cI857 ind1(rexB rexA)</i> <> <i>cat</i> )<br><i>lamB</i> <> <i>kan</i> monolysogen                    | this work |

670 **Table 2.  $\beta$ -galactosidase measurements for BACTH system demonstrates protein-protein**  
 671 **interaction between RexA and RexB with CI and Cro repressors<sup>†</sup>**  
 672

| Strain Number | Relevant Genotype                                                                            | Configurations of hybrid proteins     | $\beta$ -galactosidase Units <sup>‡</sup> |
|---------------|----------------------------------------------------------------------------------------------|---------------------------------------|-------------------------------------------|
| LT2333        | BTH101[pKT25- <i>rexA</i> ]<br>[pUT18C- <i>cI</i> ]                                          | <i>cya25-rexA</i><br><i>cya18-cI</i>  | 86 $\pm$ 20 (n=9)                         |
| LT2381        | BTH101[pKT25- <i>cI</i> ]<br>[pUT18C- <i>rexA</i> ]                                          | <i>cya25-cI</i><br><i>cya18-rexA</i>  | 105 $\pm$ 28 (n=9)                        |
| LT2447        | LT2333 <i>nadA::Tn10</i><br>( $\lambda$ cI $\langle$ > <i>kan</i> $\Delta$ ( <i>N-int</i> )) | <i>cya25-rexA</i><br><i>cya18-cI</i>  | 94 $\pm$ 6 (n=6)                          |
| LT2388        | BTH101[pKT25- <i>cro</i> ]<br>[pUT18C- <i>rexA</i> ]                                         | <i>cya25-cro</i><br><i>cya18-rexA</i> | 55 $\pm$ 1.2 (n=6)                        |
| LT2331        | BTH101[pKT25- <i>rexB</i> ]<br>[pUT18C- <i>cI</i> ]                                          | <i>cya25-rexB</i><br><i>cya18-cI</i>  | 558 $\pm$ 129 (n=9)                       |
| LT2332        | BTH101[pKNT25- <i>rexB</i> ]<br>[pUT18C- <i>cI</i> ]                                         | <i>rexB-cya25</i><br><i>cya18-cI</i>  | 252 $\pm$ 74 (n=9)                        |
| LT2383        | BTH101[pKT25- <i>cI</i> ]<br>[pUT18- <i>rexB</i> ]                                           | <i>cya25-cI</i><br><i>rexB-cya18</i>  | 118 $\pm$ 30 (n=6)                        |
| LT2385        | BTH101[pKT25- <i>cI</i> ]<br>[pUT18C- <i>rexB</i> ]                                          | <i>cya25-cI</i><br><i>cya18-rexB</i>  | 104 $\pm$ 17 (n=6)                        |
| LT2446        | LT2331 <i>nadA::Tn10</i><br>( $\lambda$ cI $\langle$ > <i>kan</i> $\Delta$ ( <i>N-int</i> )) | <i>cya25-rexB</i><br><i>cya18-cI</i>  | 247 $\pm$ 125 (n=6)                       |

|        |                                                      |                                       |                 |
|--------|------------------------------------------------------|---------------------------------------|-----------------|
| LT2394 | BTH101[pKT25- <i>cro</i> ]<br>[pUT18C- <i>rexB</i> ] | <i>cya25-cro</i><br><i>cya18-rexB</i> | 316 ± 138 (n=6) |
| LT2410 | BTH101[pKT25- <i>cro</i> ]<br>[pUT18C- <i>cI</i> ]   | <i>cya25-cro</i><br><i>cya18-cI</i>   | 84 ± 18 (n=6)   |
| LT2415 | BTH101[pKT25- <i>cI</i> ]<br>[pUT18C- <i>cI</i> ]    | <i>cya25-cI</i><br><i>cya18-cI</i>    | 893 ± 46 (n=5)  |
| LT2416 | BTH101[pKT25- <i>cro</i> ]<br>[pUT18C- <i>cro</i> ]  | <i>cya25-cro</i><br><i>cya18-cro</i>  | 631 ± 173 (n=5) |

673 †Only plasmid pairs conferring growth on minimal maltose are included here.

674 ‡Standard error of the mean is shown.

675

676 **References**

677

678 Arkin, A., Ross, J., & McAdams, H. H. (1998). Stochastic kinetic analysis of developmental  
679 pathway bifurcation in phage lambda-infected Escherichia coli cells. *Genetics*, *149*(4),  
680 1633-1648.

681 Baek, K., Svenningsen, S., Eisen, H., Sneppen, K., & Brown, S. (2003). Single-cell analysis of  $\lambda$   
682 immunity regulation. *J Mol Biol*, *334*(3), 363-372.

683 Beckett, D., Burz, D. S., Ackers, G. K., & Sauer, R. T. (1993). Isolation of  $\lambda$  repressor mutants  
684 with defects in cooperative operator binding. *Biochemistry*, *32*(35), 9073-9079.  
685 doi:10.1021/bi00086a012

686 Bednarz, M., Halliday, J. A., Herman, C., & Golding, I. (2014). Revisiting bistability in the  
687 lysis/lysogeny circuit of bacteriophage lambda. *PLoS One*, *9*(6), e100876.  
688 doi:10.1371/journal.pone.0100876

689 Bell, C. E., Frescura, P., Hochschild, A., & Lewis, M. (2000). Crystal structure of the lambda  
690 repressor C-terminal domain provides a model for cooperative operator binding. *Cell*,  
691 *101*(7), 801-811. doi:10.1016/s0092-8674(00)80891-0

692 Benzer, S. (1955). FINE STRUCTURE OF A GENETIC REGION IN BACTERIOPHAGE.  
693 *Proc Natl Acad Sci U S A*, *41*(6), 344-354.

694 Burz, D. S., & Ackers, G. K. (1994). Single-site mutations in the C-terminal domain of  
695 bacteriophage  $\lambda$  *cI* repressor alter cooperative interactions between dimers adjacently  
696 bound to  $O_R$ . *Biochemistry*, *33*(28), 8406-8416. doi:10.1021/bi00194a004

697 Coetsee, W. F., & Pollard, E. C. (1974). Near-UV effects on the induction of prophage. *Radiat*  
698 *Res*, *57*(2), 319-331.

- 699 Craig, N. L., & Roberts, J. W. (1980). *E. coli* recA protein-directed cleavage of phage  $\lambda$  repressor  
700 requires polynucleotide. *Nature*, 283(5742), 26-30. doi:10.1038/283026a0
- 701 Crick, F. H., Barnett, L., Brenner, S., & Watts-Tobin, R. J. (1961). General nature of the genetic  
702 code for proteins. *Nature*, 192, 1227-1232. doi:10.1038/1921227a0
- 703 d'Ari, R. (1985). The SOS system. *Biochimie*, 67(3-4), 343-347. doi:10.1016/s0300-  
704 9084(85)80077-8
- 705 Darling, P. J., Holt, J. M., & Ackers, G. K. (2000). Coupled energetics of  $\lambda$  *cro* repressor self-  
706 assembly and site-specific DNA operator binding II: cooperative interactions of *cro*  
707 dimers. *J Mol Biol*, 302(3), 625-638. doi:10.1006/jmbi.2000.4050
- 708 Dodd, I. B., Perkins, A. J., Tsemitsidis, D., & Egan, J. B. (2001). Octamerization of lambda CI  
709 repressor is needed for effective repression of P(RM) and efficient switching from  
710 lysogeny. *Genes Dev*, 15(22), 3013-3022. doi:10.1101/gad.937301
- 711 Dodd, I. B., Shearwin, K. E., & Egan, J. B. (2005). Revisited gene regulation in bacteriophage  $\lambda$ .  
712 *Curr Opin Genet Dev*, 15(2), 145-152. doi:10.1016/j.gde.2005.02.001
- 713 Echols, H. (1986). Bacteriophage  $\lambda$  development: temporal switches and the choice of lysis or  
714 lysogeny. *Trends in Genetics*, 2, 26-30.
- 715 Echols, H., Green, L., Oppenheim, A. B., Oppenheim, A., & Honigman, A. (1973). Role of the  
716 *cro* gene in bacteriophage  $\lambda$  development. *J Mol Biol*, 80(2), 203-216. doi:10.1016/0022-  
717 2836(73)90167-8
- 718 Eisen, H., Brachet, P., Pereira da Silva, L., & Jacob, F. (1970). Regulation of repressor  
719 expression in  $\lambda$ . *Proc Natl Acad Sci U S A*, 66(3), 855-862. doi:10.1073/pnas.66.3.855
- 720 Eisen, H., Georgiou, M., Georgopoulos, C. P., Selzer, G., Gussin, G., & Herskowitz, I. (1975).  
721 The role of gene *cro* in phage development. *Virology*, 68(1), 266-269.

- 722 Ennis, D. G., Ossanna, N., & Mount, D. W. (1989). Genetic separation of *Escherichia coli recA*  
723 functions for SOS mutagenesis and repressor cleavage. *J Bacteriol*, *171*(5), 2533-2541.  
724 doi:10.1128/jb.171.5.2533-2541.1989
- 725 Folkmanis, A., Maltzman, W., Mellon, P., Skalka, A., & Echols, H. (1977). The essential role of  
726 the *cro* gene in lytic development by bacteriophage  $\lambda$ . *Virology*, *81*(2), 352-362.  
727 doi:10.1016/0042-6822(77)90151-9
- 728 Gentile, G. M., Wetzel, K. S., Dedrick, R. M., Montgomery, M. T., Garlena, R. A., Jacobs-Sera,  
729 D., & Hatfull, G. F. (2019). More Evidence of Collusion: a New Prophage-Mediated  
730 Viral Defense System Encoded by Mycobacteriophage Sbash. *MBio*, *10*(2).  
731 doi:10.1128/mBio.00196-19
- 732 Gimble, F. S., & Sauer, R. T. (1985). Mutations in bacteriophage  $\lambda$  repressor that prevent RecA-  
733 mediated cleavage. *J Bacteriol*, *162*(1), 147-154.
- 734 Golding, I. (2011). Decision making in living cells: lessons from a simple system. *Annu Rev*  
735 *Biophys*, *40*, 63-80. doi:10.1146/annurev-biophys-042910-155227
- 736 Golding, I. (2016). Single-Cell Studies of Phage  $\lambda$ : Hidden Treasures Under Occam's Rug. *Annu*  
737 *Rev Virol*, *3*(1), 453-472. doi:10.1146/annurev-virology-110615-042127
- 738 Gussin, G. N., & Peterson, V. (1972). Isolation and properties of *rex*<sup>-</sup> mutants of bacteriophage  
739 lambda. *J Virol*, *10*(4), 760-765. doi:10.1128/jvi.10.4.760-765.1972
- 740 Hallick, L. M., & Echols, H. (1973). Genetic and biochemical properties of an association  
741 complex between host components and lambda DNA. *Virology*, *52*(1), 105-119.  
742 doi:10.1016/0042-6822(73)90402-9

- 743 Hayes, S., Bull, H. J., & Tulloch, J. (1997). The Rex phenotype of altruistic cell death following  
744 infection of a  $\lambda$  lysogen by T4rII mutants is suppressed by plasmids expressing OOP  
745 RNA. *Gene*, 189(1), 35-42.
- 746 Hayes, S., & Szybalski, W. (1973). Control of short leftward transcripts from the immunity and  
747 *ori* regions in induced coliphage lambda. *Mol Gen Genet*, 126(4), 275-290.
- 748 Jacob, F., & Campbell, A. (1959). [System of repression insuring immunity in lysogenic  
749 bacteria]. *C R Hebd Seances Acad Sci*, 248(22), 3219-3221.
- 750 Johnson, A., Meyer, B. J., & Ptashne, M. (1978). Mechanism of action of the *cro* protein of  
751 bacteriophage  $\lambda$ . *Proc Natl Acad Sci U S A*, 75(4), 1783-1787.  
752 doi:10.1073/pnas.75.4.1783
- 753 Johnson, A. D., Meyer, B. J., & Ptashne, M. (1979). Interactions between DNA-bound repressors  
754 govern regulation by the  $\lambda$  phage repressor. *Proc Natl Acad Sci U S A*, 76(10), 5061-  
755 5065.
- 756 Karimova, G., Gaudiard, E., Davi, M., Ouellette, S. P., & Ladant, D. (2017). Protein-Protein  
757 Interaction: Bacterial Two-Hybrid. *Methods Mol Biol*, 1615, 159-176. doi:10.1007/978-  
758 1-4939-7033-9\_13
- 759 Krogh, A., Larsson, B., von Heijne, G., & Sonnhammer, E. L. (2001). Predicting transmembrane  
760 protein topology with a hidden Markov model: application to complete genomes. *J Mol*  
761 *Biol*, 305(3), 567-580. doi:10.1006/jmbi.2000.4315
- 762 Landsmann, J., Kroger, M., & Hobom, G. (1982). The *rex* region of bacteriophage lambda: two  
763 genes under three-way control. *Gene*, 20(1), 11-24.

- 764 Lee, S., Lewis, D. E. A., & Adhya, S. (2018). The Developmental Switch in Bacteriophage  $\lambda$ : A  
765 Critical Role of the Cro Protein. *J Mol Biol*, 430(1), 58-68.  
766 doi:10.1016/j.jmb.2017.11.005
- 767 Lewis, D. E. A., Gussin, G. N., & Adhya, S. (2016). New Insights into the Phage Genetic  
768 Switch: Effects of Bacteriophage Lambda Operator Mutations on DNA Looping and  
769 Regulation of  $P_R$ ,  $P_L$ , and  $P_{RM}$ . *J Mol Biol*, 428(22), 4438-4456.  
770 doi:10.1016/j.jmb.2016.08.027
- 771 Little, J. W., & Michalowski, C. B. (2010). Stability and instability in the lysogenic state of  
772 phage lambda. *J Bacteriol*, 192(22), 6064-6076. doi:10.1128/jb.00726-10
- 773 Liu, X., Jiang, H., Gu, Z., & Roberts, J. W. (2013). High-resolution view of bacteriophage  
774 lambda gene expression by ribosome profiling. *Proc Natl Acad Sci U S A*, 110(29),  
775 11928-11933. doi:10.1073/pnas.1309739110
- 776 MacHattie, L. A. (1985). Endpoint distribution for deletions into *imm* $\lambda$  region forming p $\lambda$ CM  
777 replicons: phage  $\lambda$  gene *rex* affects plasmid establishment. *Gene*, 37(1-3), 19-30.  
778 doi:10.1016/0378-1119(85)90253-7
- 779 Mageeney, C. M., Mohammed, H. T., Dies, M., Anbari, S., Cudkevich, N., Chen, Y., . . . Ware,  
780 V. C. (2020). Mycobacterium Phage Butters-Encoded Proteins Contribute to Host  
781 Defense against Viral Attack. *mSystems*, 5(5). doi:10.1128/mSystems.00534-20
- 782 Maniatis, T., & Ptashne, M. (1973). Multiple repressor binding at the operators in bacteriophage  
783  $\lambda$ . *Proc Natl Acad Sci U S A*, 70(5), 1531-1535. doi:10.1073/pnas.70.5.1531
- 784 Matz, K., Schmandt, M., & Gussin, G. N. (1982). The *rex* gene of bacteriophage  $\lambda$  is really two  
785 genes. *Genetics*, 102(3), 319-327.



- 786 Montgomery, M. T., Guerrero Bustamante, C. A., Dedrick, R. M., Jacobs-Sera, D., & Hatfull, G.  
787 F. (2019). Yet More Evidence of Collusion: a New Viral Defense System Encoded by  
788 *Gordonia* Phage CarolAnn. *MBio*, *10*(2). doi:10.1128/mBio.02417-18
- 789 Oppenheim, A. B., Kobiler, O., Stavans, J., Court, D. L., & Adhya, S. (2005). Switches in  
790 bacteriophage lambda development. *Annu Rev Genet*, *39*, 409-429.  
791 doi:10.1146/annurev.genet.39.073003.113656
- 792 Ouellette, S. P., Karimova, G., Davi, M., & Ladant, D. (2017). Analysis of Membrane Protein  
793 Interactions with a Bacterial Adenylate Cyclase-Based Two-Hybrid (BACTH)  
794 Technique. *Curr Protoc Mol Biol*, *118*, 20.12.21-20.12.24. doi:10.1002/cpmb.36
- 795 Parma, D. H., Snyder, M., Sobolevski, S., Nawroz, M., Brody, E., & Gold, L. (1992). The Rex  
796 system of bacteriophage  $\lambda$ : tolerance and altruistic cell death. *Genes Dev*, *6*(3), 497-510.
- 797 Powell, B. S., Rivas, M. P., Court, D. L., Nakamura, Y., & Turnbough, C. L., Jr. (1994). Rapid  
798 confirmation of single copy lambda prophage integration by PCR. *Nucleic Acids Res*,  
799 *22*(25), 5765-5766. doi:10.1093/nar/22.25.5765
- 800 Ptashne, M., & Hopkins, N. (1968). The operators controlled by the  $\lambda$  phage repressor. *Proc Natl*  
801 *Acad Sci U S A*, *60*(4), 1282-1287.
- 802 Ptashne, M., Jeffrey, A., Johnson, A. D., Maurer, R., Meyer, B. J., Pabo, C. O., . . . Sauer, R. T.  
803 (1980). How the  $\lambda$  repressor and Cro work. *Cell*, *19*(1), 1-11.
- 804 Raibaud, O., Vidal-Ingigliardi, D., & Kolb, A. (1991). Genetic studies on the promoter of *malT*,  
805 the gene that encodes the activator of the *Escherichia coli* maltose regulon. *Res*  
806 *Microbiol*, *142*(9), 937-942. doi:10.1016/0923-2508(91)90003-s

- 807 Reichardt, L. F. (1975). Control of bacteriophage lambda repressor synthesis: regulation of the  
808 maintenance pathway of the *cro* and *cI* products. *J Mol Biol*, 93(2), 289-309.  
809 doi:10.1016/0022-2836(75)90133-3
- 810 Révet, B., von Wilcken-Bergmann, B., Bessert, H., Barker, A., & Müller-Hill, B. (1999). Four  
811 dimers of lambda repressor bound to two suitably spaced pairs of lambda operators form  
812 octamers and DNA loops over large distances. *Curr Biol*, 9(3), 151-154.  
813 doi:10.1016/s0960-9822(99)80069-4
- 814 Russell, D. A., & Hatfull, G. F. (2017). PhagesDB: the actinobacteriophage database.  
815 *Bioinformatics*, 33(5), 784-786. doi:10.1093/bioinformatics/btw711
- 816 Schoulaker-Schwarz, R., Dekel-Gorodetsky, L., & Engelberg-Kulka, H. (1991). An additional  
817 function for bacteriophage  $\lambda$  *rex*: the *rexB* product prevents degradation of the  $\lambda$  O  
818 protein. *Proc Natl Acad Sci U S A*, 88(11), 4996-5000.
- 819 Snyder, L., & McWilliams, K. (1989). The *rex* genes of bacteriophage lambda can inhibit cell  
820 function without phage superinfection. *Gene*, 81(1), 17-24.
- 821 Spiegelman, W. G., Reichardt, L. F., Yaniv, M., Heinemann, S. F., Kaiser, A. D., & Eisen, H.  
822 (1972). Bidirectional transcription and the regulation of Phage  $\lambda$  repressor synthesis. *Proc*  
823 *Natl Acad Sci U S A*, 69(11), 3156-3160. doi:10.1073/pnas.69.11.3156
- 824 Stayrook, S., Jaru-Ampornpan, P., Ni, J., Hochschild, A., & Lewis, M. (2008). Crystal structure  
825 of the  $\lambda$  repressor and a model for pairwise cooperative operator binding. *Nature*,  
826 452(7190), 1022-1025. doi:10.1038/nature06831
- 827 Sussman, R., & Jacob, F. (1962). [On a thermosensitive repression system in the Escherichia coli  
828 lambda bacteriophage]. *C R Hebd Seances Acad Sci*, 254, 1517-1519.

- 829 Svenningsen, S. L., Costantino, N., Court, D. L., & Adhya, S. (2005). On the role of Cro in  $\lambda$   
830 prophage induction. *Proc Natl Acad Sci U S A*, *102*(12), 4465-4469. doi:0409839102  
831 [pii] 10.1073/pnas.0409839102
- 832 Thomason, L. C., Costantino, N., & Court, D. L. (2007). *E. coli* genome manipulation by P1  
833 transduction. *Curr Protoc Mol Biol*, Chapter 1, Unit 1 17.  
834 doi:10.1002/0471142727.mb0117s79
- 835 Thomason, L. C., Morrill, K., Murray, G., Court, C., Shafer, B., Schneider, T. D., & Court, D. L.  
836 (2019). Elements in the  $\lambda$  immunity region regulate phage development: beyond the  
837 'Genetic Switch'. *Mol Microbiol*, *112*(6), 1798-1813. doi:10.1111/mmi.14394
- 838 Thomason, L. C., Sawitzke, J. A., Li, X., Costantino, N., & Court, D. L. (2014).  
839 Recombineering: genetic engineering in bacteria using homologous recombination. *Curr*  
840 *Protoc Mol Biol*, *106*, 1.16.11-39. doi:10.1002/0471142727.mb0116s106
- 841 Toothman, P., & Herskowitz, I. (1980). Rex-dependent exclusion of lambdoid phages. I.  
842 Prophage requirements for exclusion. *Virology*, *102*(1), 133-146.
- 843 Whipple, F. W., Kuldell, N. H., Cheatham, L. A., & Hochschild, A. (1994). Specificity  
844 determinants for the interaction of  $\lambda$  repressor and P22 repressor dimers. *Genes Dev*,  
845 *8*(10), 1212-1223. doi:10.1101/gad.8.10.1212
- 846 Witkin, E. M. (1991). RecA protein in the SOS response: milestones and mysteries. *Biochimie*,  
847 *73*(2-3), 133-141. doi:10.1016/0300-9084(91)90196-8  
848

849 **Figure Legends**

850

851 **Figure 1. Genetic map of  $\lambda$  immunity region and DNA replication genes.** The *cI* and *Cro*  
852 repressors are expressed in the  $P_{RM}$  and  $P_R$  operons, respectively, and are major players in the  
853 lysis-lysogeny decision. These two repressors control expression of the major lytic promoters  $P_L$   
854 and  $P_R$  by binding to the left and right tripartite operator sites,  $O_L$  and  $O_R$ , with the lytic  $P_R$  and  
855 lysogenic  $P_{RM}$  promoters sharing coordinate but opposing regulation within the  $O_R$  segment. The  
856 *rexA* and *rexB* genes are downstream of *cI*. The  $P_{LIT}$  promoter is embedded in the terminal  
857 coding sequence of *rexA*, with the consequence that *rexB* is transcribed from two promoters,  $P_{RM}$   
858 and  $P_{LIT}$ , while *cI* and *rexA* are transcribed only from  $P_{RM}$  (Thomason et al 2019). Black arrows  
859 represent the beginning of the various promoter transcripts shown. Transcription from  $P_{RM}$  and  
860  $P_{LIT}$  ends at the transcriptional terminator,  $T_{IMM}$ , immediately downstream of *rexB*. The DNA  
861 replication genes *O* and *P* are transcribed from  $P_R$ , as is *ren*, which is also likely involved in  
862 DNA replication.

863

864 **Figure 2.  $RexA^+$  enhances UV induction of a  $\lambda$  *cI*<sup>+</sup> prophage at low UV doses.** UV induction  
865 of  $\lambda$  lysogens was performed as described in Experimental Procedures. **A.** LT445 is MG1655( $\lambda$   
866 *cI*<sup>+</sup> *rexA*<sup>+</sup> *rexB*<sup>+</sup>) (●) (n=7); LT1676 is MG1655( $\lambda$ *cI*<sup>+</sup> *rexA*<>*cat* *rexB*<sup>+</sup>) (Δ) (n=3); LT1677 is  
867 MG1655( $\lambda$ *cI*<sup>+</sup> *rexA*<sup>+</sup> *rexB*<>*cat*) (▲) (n=6), LT1678 is MG1655( $\lambda$ *cI*<sup>+</sup> *rexA*-*rexB*<>*cat*) (○)  
868 (n=3). Titers of the lysates on strain A584 were determined at t=0 and the time points indicated  
869 following UV irradiation. **B.** LT445 is MG1655( $\lambda$ ) (●); LT1678 is MG1655( $\lambda$  *rexA*-*rexB*<>*cat*)  
870 (○) (n=3); LT2109 is MG1655( $\lambda$  *rexA*-*rexB*<>*cat*)/ $P_{BAD}$ -*rexA*<sup>+</sup> *rexB*<sup>+</sup> (◻) (n=4). Data have been  
871 analyzed by the standard error of the mean (s.e.m). The number of trials is indicated by (n).

872

873 **Figure 3. Genetic map of dual  $P_L P_R$  reporter.** The phage  $\lambda$  immunity region has been inserted  
874 within the *E. coli lac* operon such that expression of *lacZ* is driven from the  $P_R$  lytic promoter  
875 (Svenningsen 2005) with the *lacI* gene and the *lac* promoter being replaced by  $P_R$ . This leaves  
876 the *lacZ* ribosome-binding site and the rest of the *lacZYA* operon intact. Versions of this reporter  
877 with the temperature sensitive *cI857* repressor were used to determine the effects of RexA and/or  
878 RexB functions on induction and the switch to activate  $P_L$  and  $P_R$  promoter transcription. Single  
879 colonies were grown on MacConkey Lactose indicator medium. When the switch is in the CI-  
880 repressed or immune state, colonies do not express LacZ and are white. When the switch is in the  
881 Cro-repressed nonimmune state, *lacZ* is expressed from  $P_R$  and the colonies are red. The firefly  
882 luciferase gene *luc* replaces the  $\lambda N$  gene beyond the  $P_L$  promoter.

883

884 **Figure 4. RexA promotes the transition to nonimmune state within individual colonies.** In  
885 these pictures, colonies of strains containing the  $P_L$  and  $P_R$  reporters with the temperature  
886 sensitive *cI857* repressor allele were plated on MacConkey Lactose agar and incubated at 32°-  
887 34°C. All colonies are white after one day of incubation but develop red papillae after two days,  
888 indicative of a transition to the lytic state by cells within the colony and consequent expression of  
889 *lacZ* from  $P_R$ . The *rex* genotypes are indicated, and the strain numbers are shown below. **A.** Top  
890 row: the strains (LT1886, LT1887, LT1891, and LT1892) display different papillation levels  
891 dependent on the genotype of the *rexA* and *rexB* genes. **B.** Middle row: The *recA* mutant strains  
892 (LT2063, LT2064, LT2065, and LT2066) also display variable papillation based on *rex*  
893 genotype. **C.** Bottom row: The *cro27* mutant strains of  $\lambda$  (LT1055, LT1395, LT1865, and  
894 LT1866) all papillate similarly, regardless of *rex* genotype.

895

896 **Figure 5. RexA function stabilizes the non-immune state.** RecA<sup>+</sup> and RecA<sup>-</sup> colonies

897 containing the Cro<sup>+</sup> P<sub>R</sub> reporter pictured in Fig. 3 were analyzed to determine the effect of RexA

898 and RexB on the frequency of returning from the non-immune state to the immune state in the

899 presence of Cro repression. The y-axis indicates the percentage of immune (white) colonies

900 arising during overnight growth of a culture that initially carried a reporter in the non-immune

901 (red) state. The final number of colonies analyzed for each genotype is indicated. The error bars

902 show the standard deviation (s.d.). **A.** RecA<sup>+</sup> strains: LT1886, *rexA*<sup>+</sup> *rexB*<sup>+</sup> (n=18); LT1887, *rexA*<sup>-</sup>

903 *rexB*<sup>+</sup> (n=21); LT1891, *rexA*<sup>+</sup> *rexB*<sup>-</sup> (n=22); LT1892, *rexA*<sup>-</sup> *rexB*<sup>-</sup> (n=20). **B.**  $\Delta$ *recA* strains:

904 LT2063, *rexA*<sup>+</sup> *rexB*<sup>+</sup> (n=17); LT2064, *rexA*<sup>-</sup> *rexB*<sup>+</sup> (n=14); LT2065, *rexA*<sup>+</sup> *rexB*<sup>-</sup> (n=15);

905 LT2066, *rexA*<sup>-</sup> *rexB*<sup>-</sup> (n=14).

906

907 **Figure 6. Monitoring luciferase activity from P<sub>L</sub> N-luc after inducing DNA damage.** After

908 addition of Mitomycin C, expression of firefly luciferase from the P<sub>L</sub> promoter (P<sub>L</sub> N-luc) was

909 monitored over time for four strains carrying the lambda immunity region and different *rexA* and

910 *rexB* mutations. Relative light units are shown on the y-axis and time in minutes on the x-axis.

911 The DNA damage inducer, Mitomycin C, was added at t=0. For the first ~two hours all points

912 are congruent, but Rex-dependent genotypic differences arise in luciferase expression are

913 apparent after ~150 min. (A). LT1895, *rexA*<sup>+</sup> *rexB* $\langle\rangle$ *cat* ( $\Delta$ ) vs. LT1897, (*rexA* *rexB*) $\langle\rangle$ *cat* ( $\circ$ ).

914 (B). LT1659, *rexA* $\langle\rangle$ *cat* *rexB*<sup>+</sup> ( $\blacktriangle$ ) vs. LT1897, (*rexA* *rexB*) $\langle\rangle$ *cat* ( $\circ$ ).(C). LT1895, *rexA*<sup>+</sup>

915 *rexB* $\langle\rangle$ *cat* ( $\Delta$ ) vs. LT1657, *rexA*<sup>+</sup> *rexB*<sup>+</sup> ( $\bullet$ ). (D). LT1659, *rexA* $\langle\rangle$ *cat* *rexB*<sup>+</sup> ( $\blacktriangle$ ) vs. LT1657,

916 *rexA*<sup>+</sup> *rexB*<sup>+</sup> ( $\bullet$ ). (E). LT1657, *rexA*<sup>+</sup> *rexB*<sup>+</sup> ( $\bullet$ ) vs. LT1897, (*rexA* *rexB*) $\langle\rangle$ *cat* ( $\circ$ ). The

917 experiment was repeated three times with duplicate technical replicates each time; one  
918 representative experiment is shown.

919

920 **Figure 7. RexA and RexB affect the level of spontaneous phage release from  $\lambda$ CI857 *ind1***

921 **lysogens.** The bar graph shows the plaque-forming units (PFU) per ml of spontaneously released  
922 phage particles arising during 32°C growth of lysogenic cultures. Strain numbers and *rex*  
923 genotypes for each culture are indicated below the bars. Three independent repetitions of each  
924 experiment were performed; error bars represent the standard deviation (s.d.).

925

926 **Figure 8. RexA forms stable complexes with CI and DNA *in vitro*.** A. SEC-MALS analysis of

927 purified RexA. UV trace (black) and measured mass based on light scattering (blue) are shown.

928 **B.** SEC analysis of RexA and CI protein-protein and protein-DNA interactions. SDS-PAGE gels

929 (silver-stained for DNA and Coomassie-stained for protein) from individual SEC injections are

930 numbered with Roman numerals and shown to visualize shifts in retention volume off of SEC in

931 response to different conditions. Molecular weight standards in kDa are shown in the first lane of

932 each gel with samples labeled on the right. All samples were run on a Superdex 200 PC 3.2

933 column (GE). The elution volume across the fractions is marked above along with the relative

934 positions of molecular weight standards (F, ferritin, 440 kDa; A, aldolase, 158 kDa; C,

935 conalbumin, 75 kDa; O, ovalbumin, 44 kDa; CA, carbonic anhydrase, 29 kDa). A leftward shift

936 of the bands indicates formation of a larger molecular weight species and is associated with

937 complex formation. See Materials and Methods and Table S3 for DNA substrate preparation and

938 oligonucleotide sequences, respectively. **C.** Filter binding analysis of RexA interactions with

939 different DNA substrates. Substrate nomenclature: OR1-OR2, double-stranded DNA containing

940 wildtype  $O_{R1}$  and  $O_{R2}$  operator sites; ss, single-stranded DNA; scrambled, mutated substrate  
941 altering operator site sequences. Binding was performed with wildtype RexA at 30°C for 10 min  
942 in a 30  $\mu$ L reaction mixture containing 14.5 nM unlabeled DNA and 0.5 nM labelled DNA.  
943 Samples were filtered through KOH-treated nitrocellulose and binding was assessed by  
944 scintillation counting. The data points represent the averages of at least three independent  
945 experiments (mean  $\pm$  standard deviation) and were compared to a negative control to determine  
946 fraction bound.

947  
948 **Figure 9. Effect of RexA on the transition from the lytic state to the immune state.** When  
949 only the phage immunity region is present on the *E. coli* chromosome (see Figure 3), the bistable  
950 switch can be in either the immune or nonimmune state. The purified red colonies used for the  
951 experiment of Figure 5 have the switch in the nonimmune state, with the Cro protein expressed  
952 from  $P_R$  repressing  $P_{RM}$ , so that *cI* and *rexA* are not expressed. Because of stochastic events,  
953 switching to the immune state may occur that relieves Cro repression and allows some  $P_{RM}$   
954 transcription, resulting in *cI* and *rexA* expression. The data of Figure 5 show that in this situation,  
955 RexA protein lessens the probability that CI can establish immune repression, and thus RexA  
956 stabilizes the lytic state. If *rexA* is mutant, the switch tends to return to the lysogenic state.

957  
958 **Figure 10. Model for involvement of RexA and RexB in the transition to lytic growth.**  
959 **Top Panel:** The divergent  $P_{RM}$  and  $P_R$  promoters and the right operator sites are illustrated. In  
960 the lysogenic state, CI dimers are bound cooperatively to  $O_{R1}$  and  $O_{R2}$ , repressing  $P_R$ , and  
961 transcription of  $P_{RM}$  is activated by CI contacting RNA polymerase. Similar CI dimers bound to  
962  $O_{L1}$  and  $O_{L2}$  repress the  $P_L$  promoter (not shown in diagram), with long-range DNA looping



963 between the left and right operators mediated by CI repressor molecules. This is the normal state  
964 in a  $\lambda$  lysogen. In response to an inducing signal such as DNA damage, RecA protein becomes  
965 activated (RecA\*) and binds to CI repressor, promoting CI inactivation. This allows transcription  
966 from  $P_L$  and  $P_R$  and subsequent Cro expression; Cro will bind to  $O_{R3}$  and repress  $P_{RM}$   
967 transcription. **Middle Panel:** Our two-hybrid data suggest protein-protein interactions between  
968 CI repressor and the integral membrane protein, RexB. Here, we have shown the CI repressor  
969 protein bound to the operator sites while in association with RexB, which may prevent RexA  
970 action and deepen repression. This postulated membrane association is not the tight membrane  
971 tethering of the lambda genome observed by Hallick and Echols (1973). Our two-hybrid data  
972 also show interaction between RexB and RexA (Thomason et al. 2019). **Bottom Panel:** It is  
973 possible that CI, RexB, and RexA co-localize at the periphery of the inner membrane to form a  
974 complex that includes all three proteins. CI and RexA can be released from RexB, perhaps in  
975 response to an environmental signal or a conformational change in RexB. RexA is then free to  
976 interact with CI repressor bound to DNA at the operator sites; RexA may also bind DNA  
977 nonspecifically. These protein-protein and protein-DNA interactions may destabilize CI  
978 repression and activate the lytic state.

979

#### 980 **Figure 11. Predicted RexB membrane topology and location of charged amino acid**

981 **residues.** The computer program TMHMM was used to predict the orientation of RexB in the *E.*  
982 *coli* cytoplasmic membrane. The numbers indicate the locations of amino acid residues, with the  
983 first and last residues of each transmembrane spanning domain shown. The negatively charged  
984 residue in the third transmembrane domain may serve as a proton sink and play some role in

985 energetics. The relative locations of charged amino acids are also indicated. Created with

986 BioRender.com.

987

Figure 1

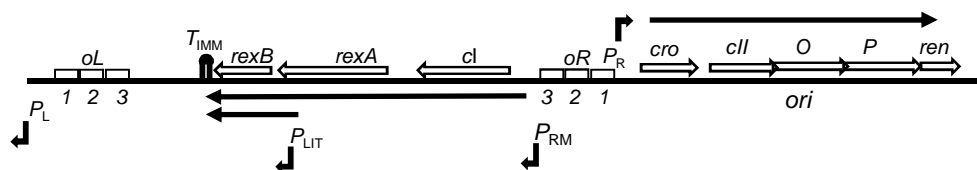

Figure 2

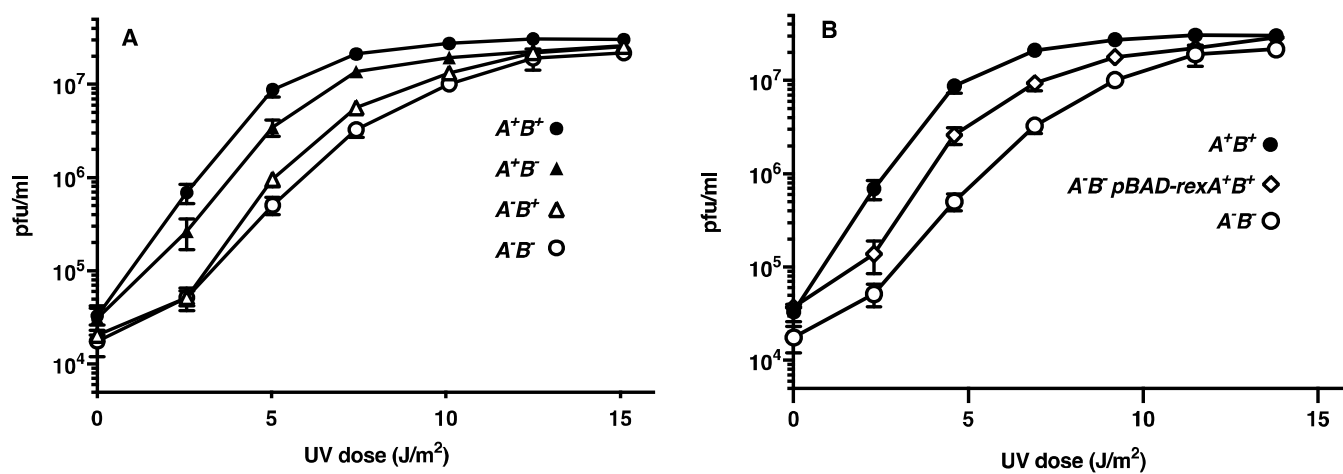

Figure 3

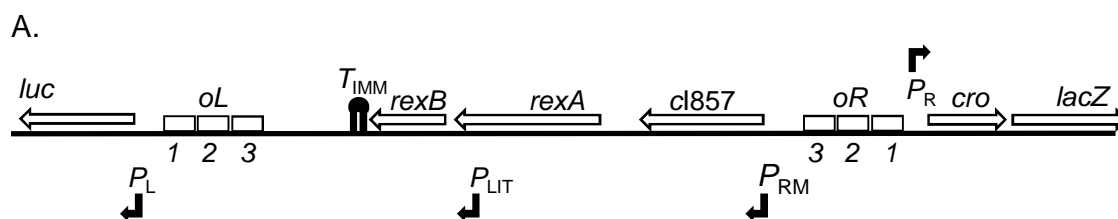

Figure 4

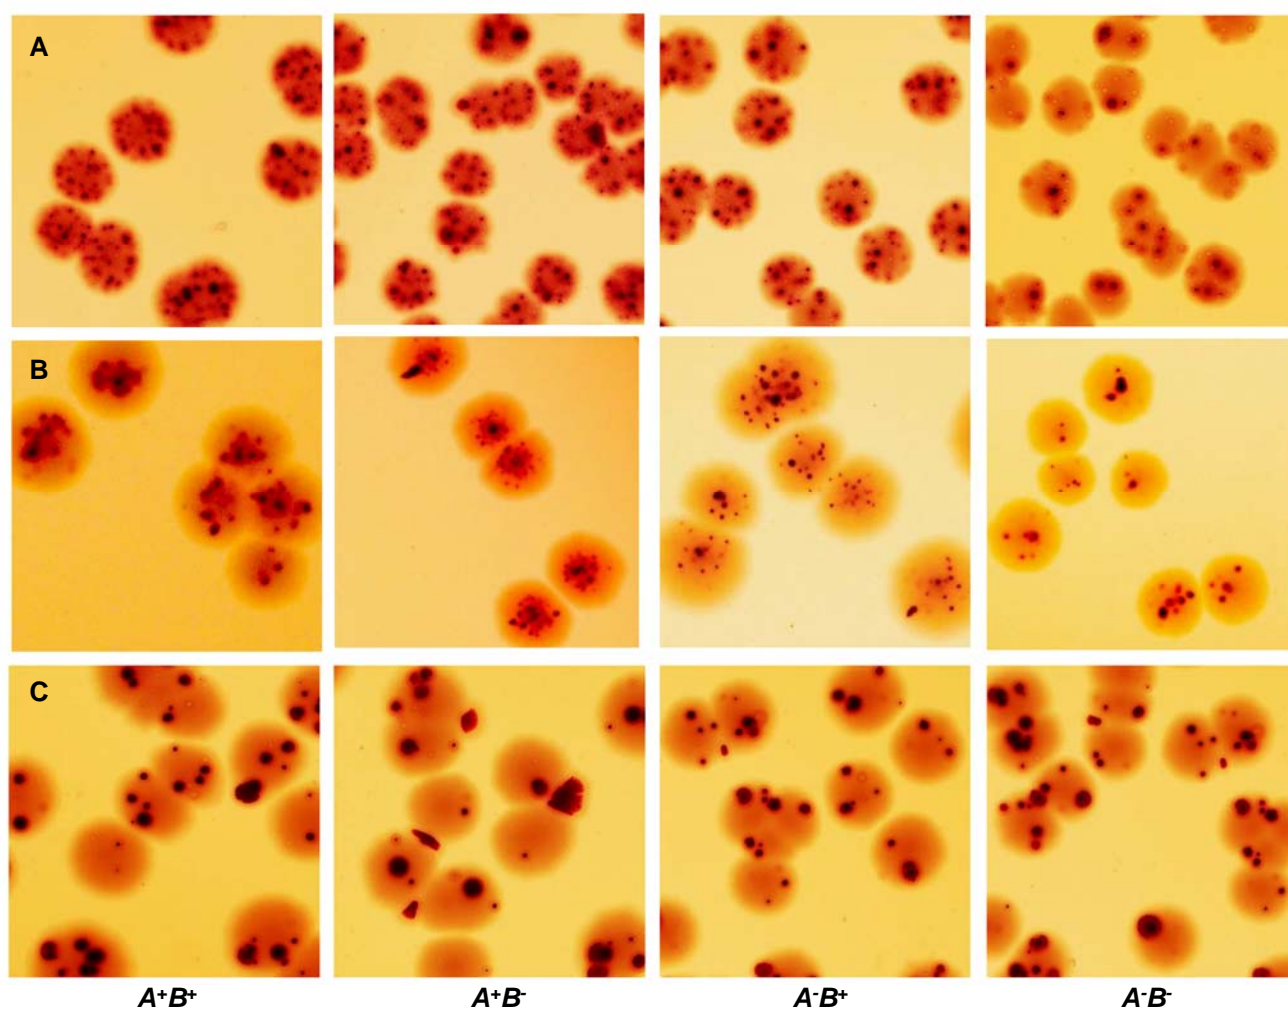

Figure 5.

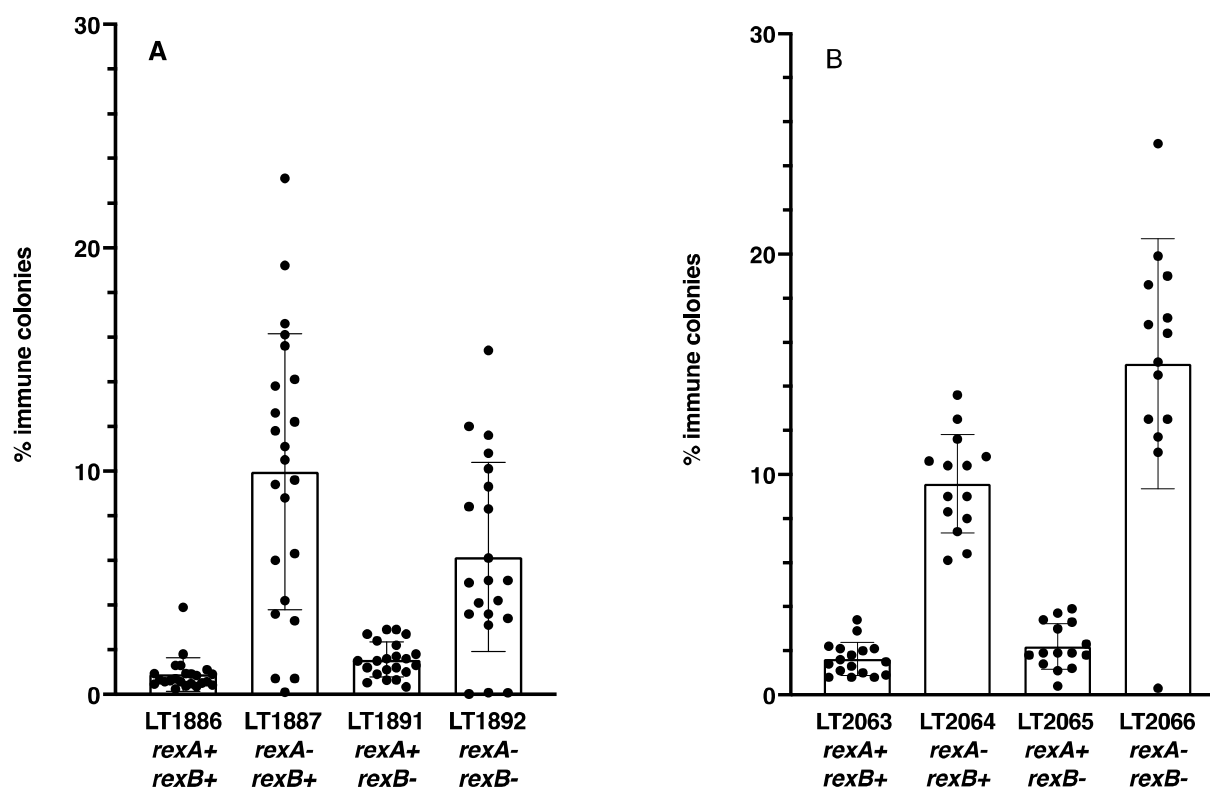

Figure 6.

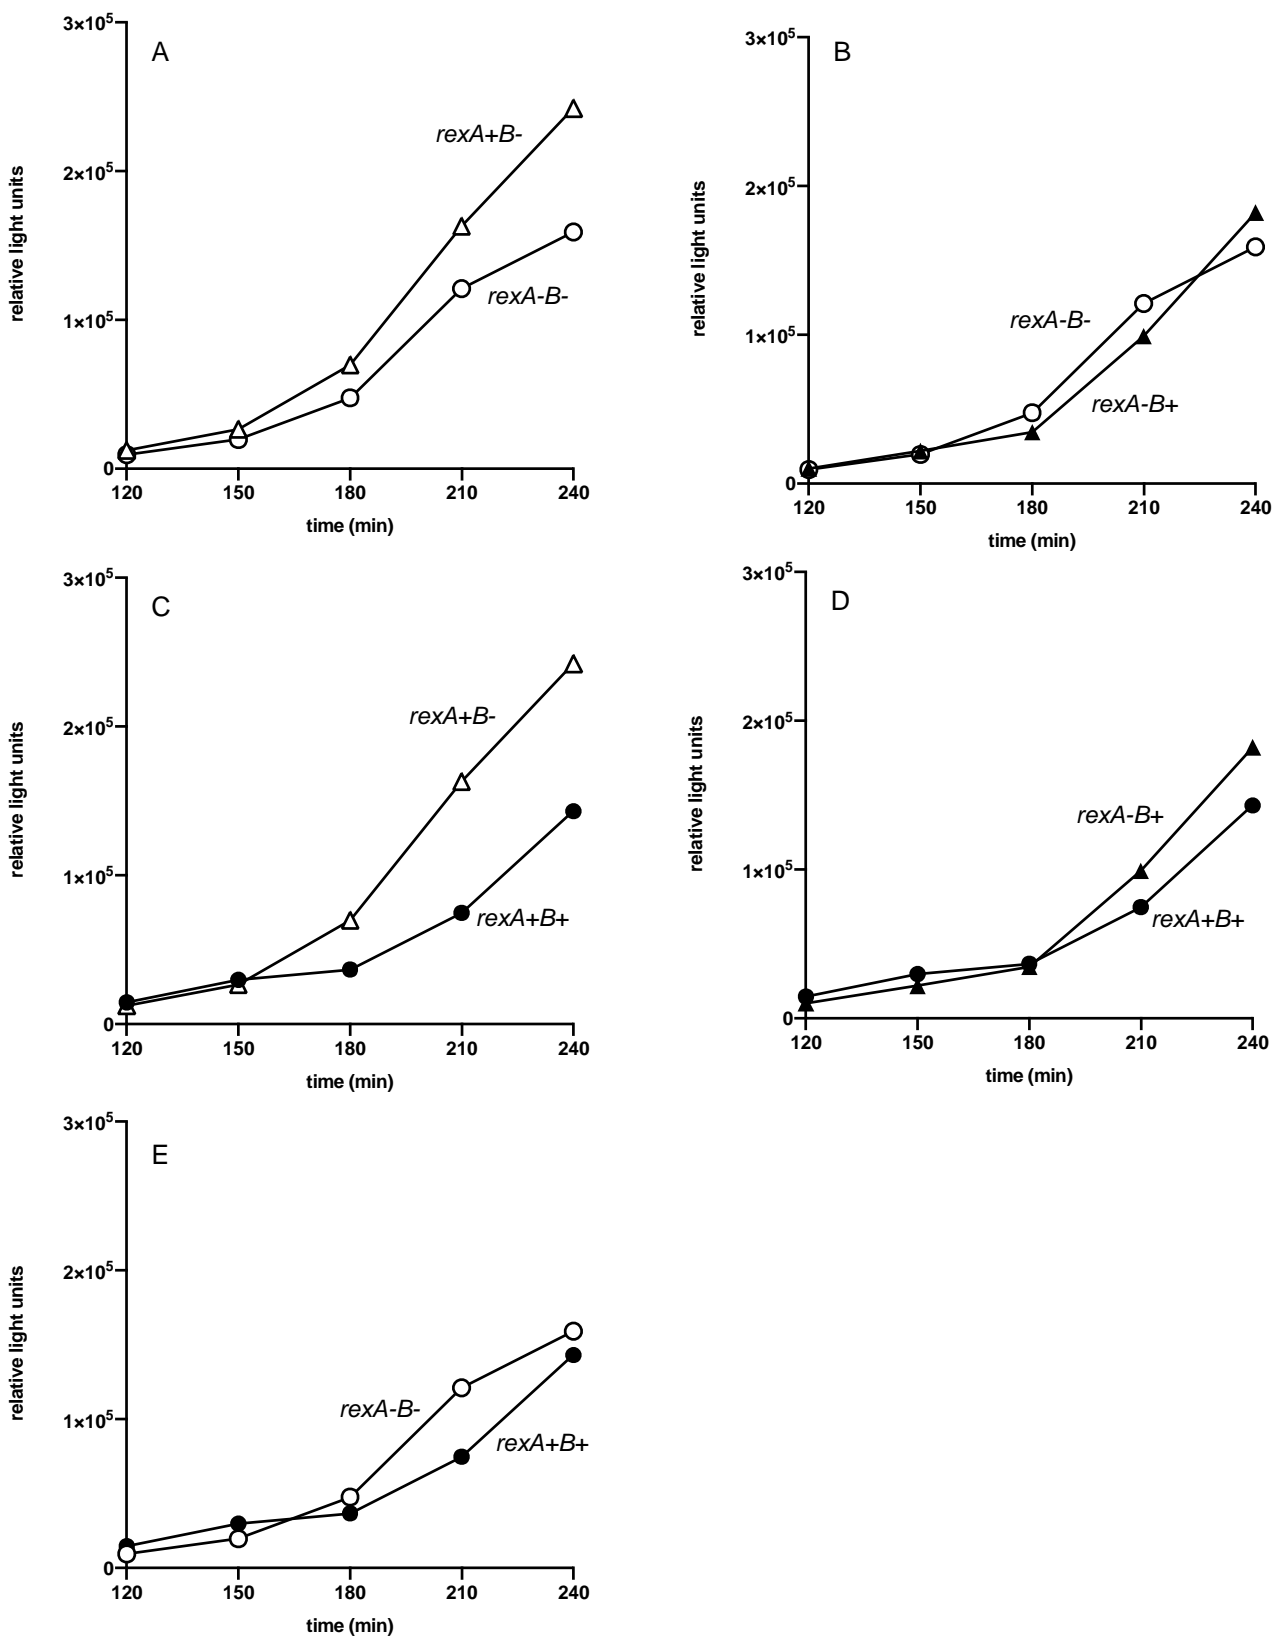



Figure 7.

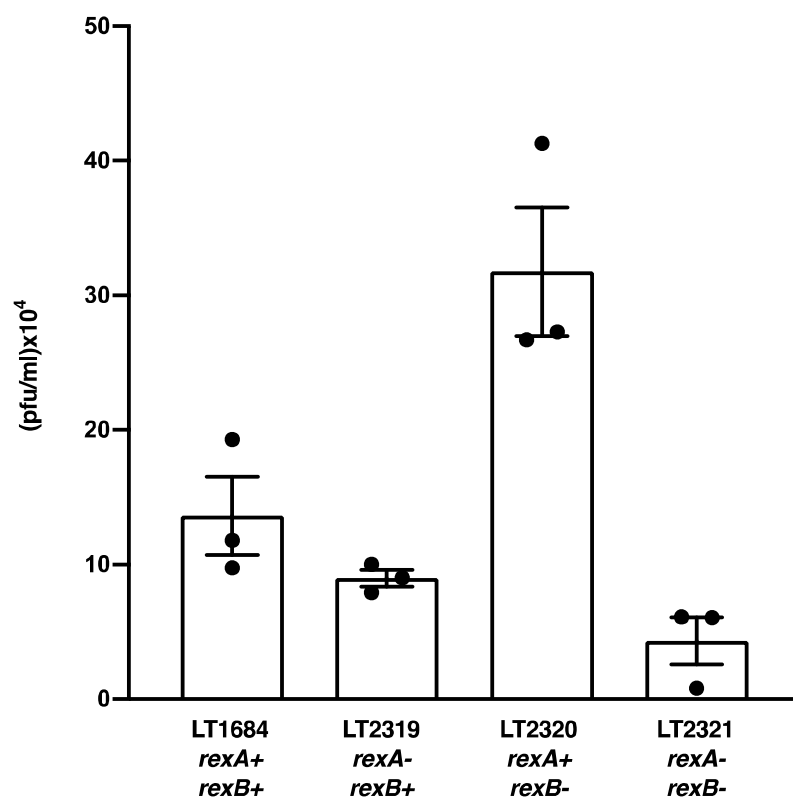

Figure 8

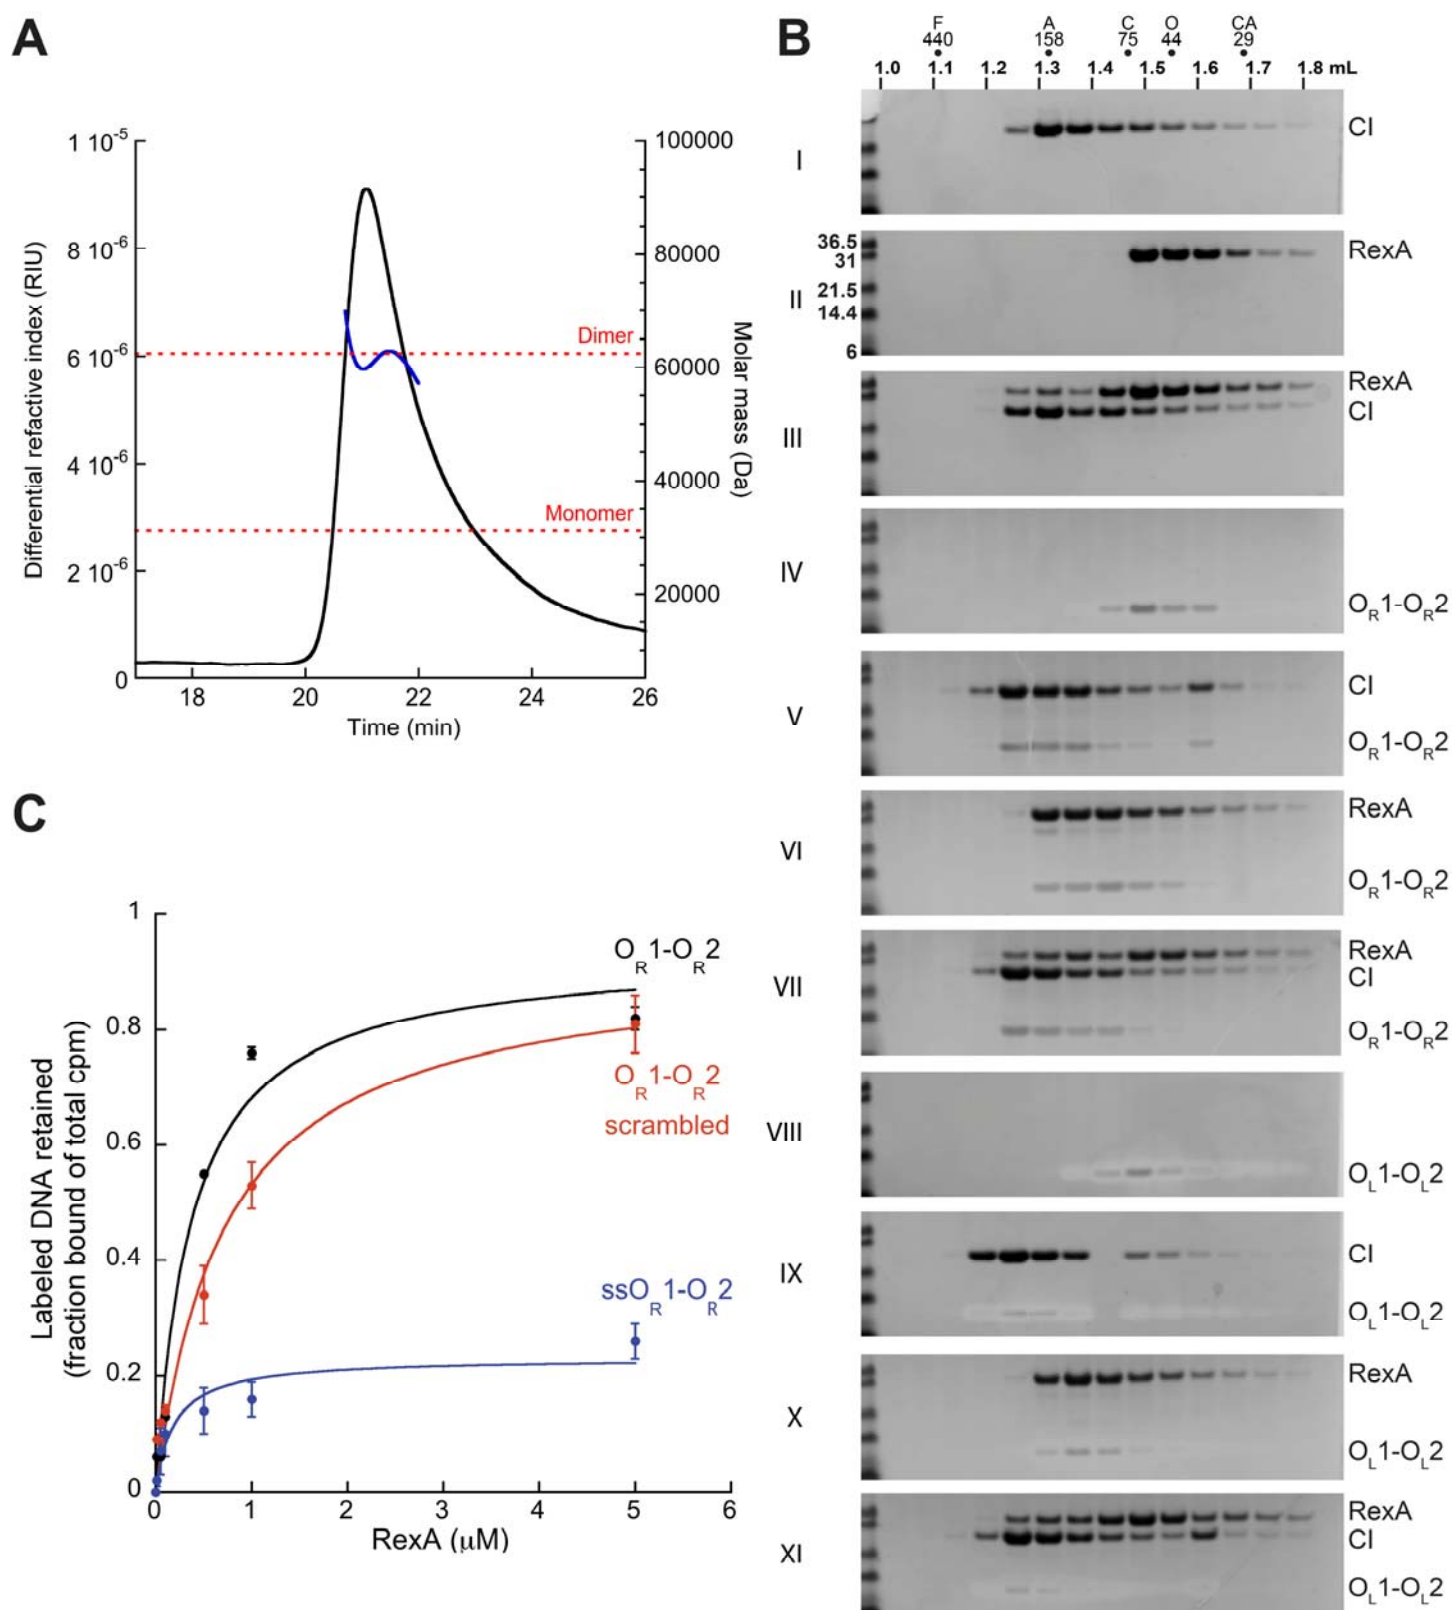

Figure 9

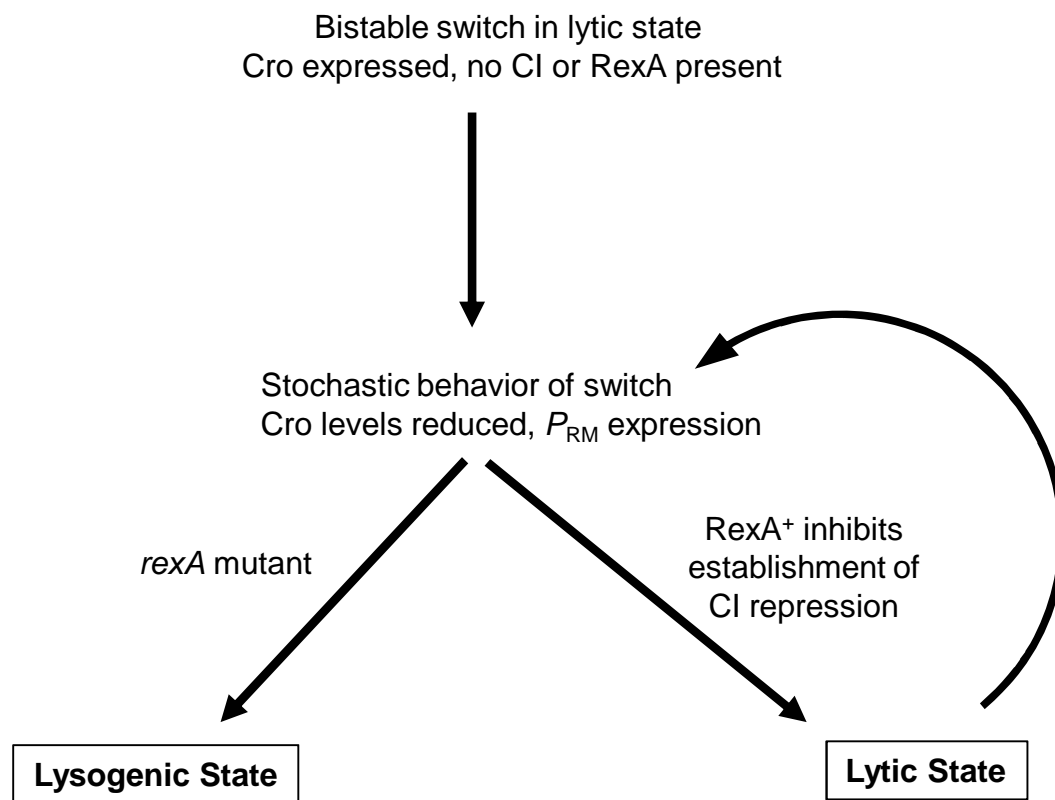

Figure 10

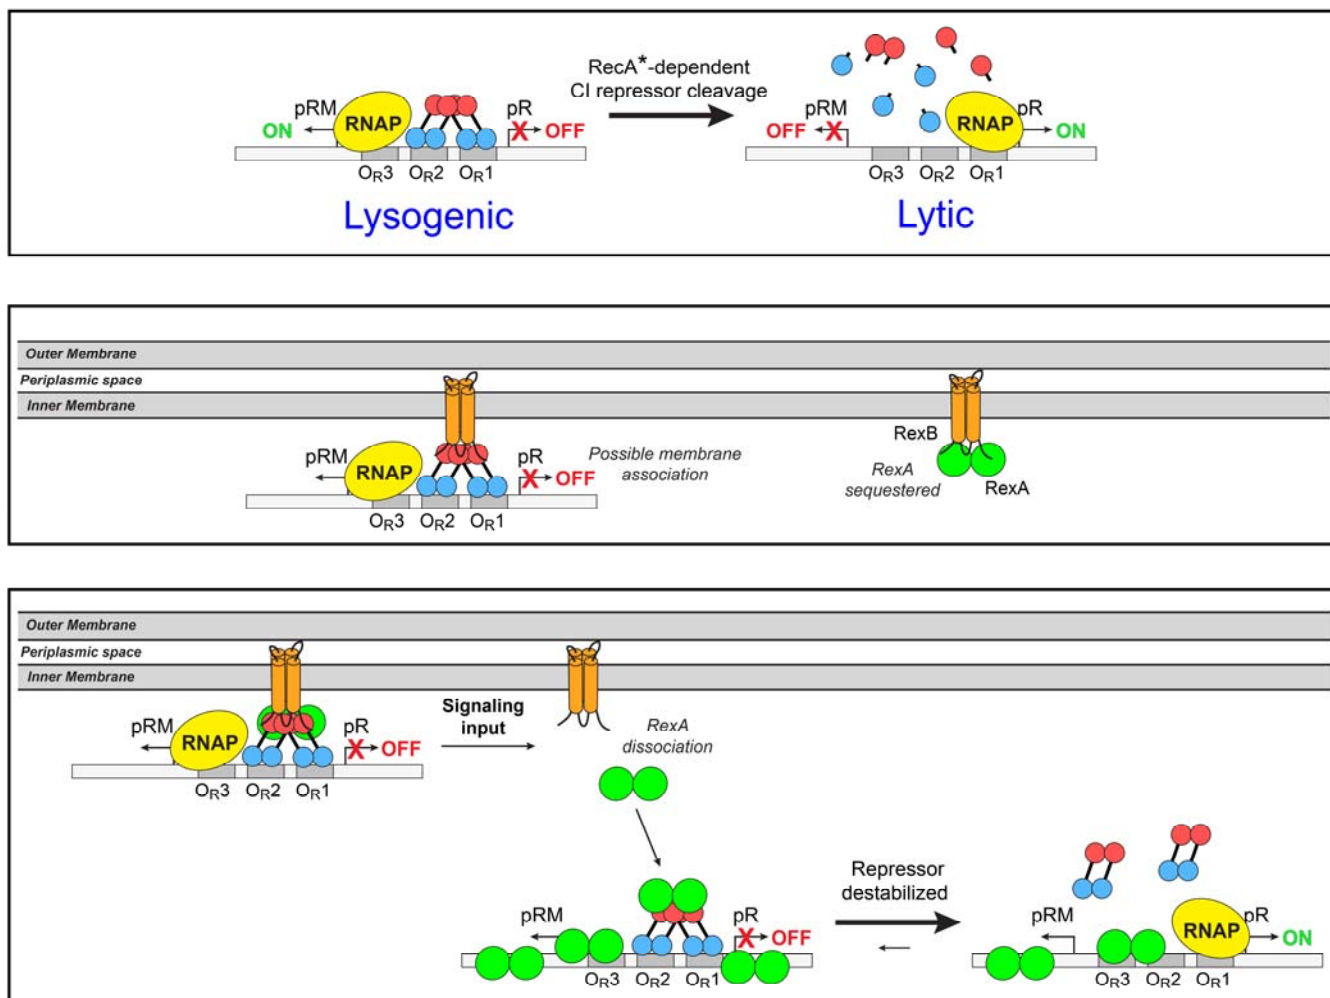

Figure 11

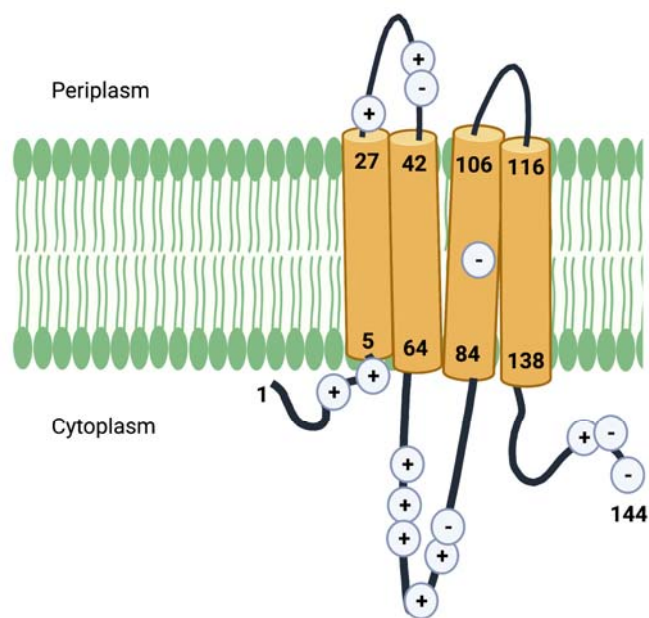

Source: http://biorxiv.org/content/10.1101/2021.04.19.439022v1.full.pdf
